# Supplementary material for: Computational assessment of the radical scavenging activity of cleomiscosin
Source: Royal Society of Chemistry journal article supplement (doi:10.1039/d4ra03260h), 2024-01-01
Supplement: d4ra03260h1.pdf [file d4ra03260h1.pdf]

## Supporting Information (SI)

---

# Computational assessment of the radical scavenging activity of natural cleomiscosins

Nguyen Quang Trung,<sup>1,2</sup> Adam Mechler<sup>3</sup> and Quan V. Vo<sup>4\*</sup>

<sup>1</sup>*The University of Danang - University of Science and Education, Da Nang 550000, Vietnam.*

<sup>2</sup>*Quality assurance and Testing center 2, Da Nang 550000, Vietnam.*

<sup>3</sup>*Department of Biochemistry and Chemistry, La Trobe University, Victoria 3086, Australia.*

<sup>4</sup>*The University of Danang - University of Technology and Education, Danang 550000,  
Vietnam.*

\*Corresponding authors: [vvquan@ute.udn.vn](mailto:vvquan@ute.udn.vn);

## Table of Contents

|                                                                                                                                                 |   |
|-------------------------------------------------------------------------------------------------------------------------------------------------|---|
| Table S1. The method to calculate rate constant following the conventional transition state theory .....                                        | 2 |
| Table S2: The Cartesian coordinates and energies of CMs, ANION, TSs in the studied media (G: gas phase; P:<br>pentyl ethanoate; H: water) ..... | 3 |
| References .....                                                                                                                                | 4 |

**Table S1.** The method to calculate rate constant following the conventional transition state theory

The rate constant ( $k$ ) was calculated by using the conventional transition state theory (TST) (at 298.15 K, 1M standard state) according to the equation (1):<sup>1-5</sup>

$$k = \sigma \kappa \frac{k_B T}{h} e^{-(\Delta G^\ddagger)/RT} \quad (1)$$

Where:  $\sigma$  is the reaction symmetry number,<sup>6,7</sup>

$\kappa$  contains the tunneling corrections calculated using the Eckart barrier,<sup>8</sup>

$k_B$  is the Boltzmann constant,

$h$  is the Planck constant,

$\Delta G^\ddagger$  is the Gibbs free energy of activation.

The Marcus Theory was used to estimate the reaction barriers of SET reactions.<sup>9-12</sup> The free energy of reaction  $\Delta G^\ddagger$  for the SET pathway was computed following the equations (2,3).

$$\Delta G_{\text{SET}}^\ddagger = \frac{\lambda}{4} \left( 1 + \frac{\Delta G_{\text{SET}}^0}{\lambda} \right)^2 \quad (2)$$

$$\lambda \approx \Delta E_{\text{SET}} - \Delta G_{\text{SET}}^0 \quad (3)$$

where  $\Delta G_{\text{SET}}$  is the Gibbs energy of reaction,  $\Delta E_{\text{SET}}$  is the non-adiabatic energy difference between reactants and vertical products for SET ( $\Delta E_{\text{SET}} = E_{\text{vertical}}(\text{products}) - E_{\text{adiabatic}}(\text{reactants})$ )<sup>13,14</sup>

For rate constants that were close to the diffusion limit a correction was applied to yield realistic results<sup>15</sup>. The apparent rate constants ( $k_{\text{app}}$ ) were calculated following the Collins–Kimbball theory in the solvents at 298.15K;<sup>16</sup> the steady-state Smoluchowski rate constant ( $k_D$ ) for an irreversible bimolecular diffusion–controlled reaction was calculated following the literature as corroding to equations (4,5).<sup>15,17</sup>

$$k_{\text{app}} = \frac{k_{\text{TST}} k_D}{k_{\text{TST}} + k_D} \quad (4)$$

$$k_D = 4\pi R_{AB} D_{AB} N_A \quad (5)$$

where  $R_{AB}$  is the reaction distance,  $N_A$  is the Avogadro constant, and  $D_{AB} = D_A + D_B$  ( $D_{AB}$  is the mutual diffusion coefficient of the reactants A and B),<sup>16,18</sup> where  $D_A$  or  $D_B$  is estimated using the Stokes–Einstein formulation (6).<sup>19,20</sup>

$$D_{A \text{ or } B} = \frac{k_B T}{6\pi \eta a_{A \text{ or } B}} \quad (6)$$

$\eta$  is the viscosity of the solvents (i.e.  $\eta(\text{H}_2\text{O}) = 8.91 \times 10^{-4}$  Pa s,  $\eta(\text{pentyl ethanoate}) = 8.62 \times 10^{-4}$  Pa s) and  $a$  is the radius of the solute.

The kinetic study requires different considerations. Water and pentyl ethanoate are the *de facto* standard solvents in the literature to mimic the polar and nonpolar environments in the human body.<sup>15,21-23</sup> Thus, these solvents were used to model the physiological environments. The solvent cage effects were included following the corrections proposed by Okuno,<sup>24</sup> adjusted with the free volume theory according to the Benson correction<sup>15,25-27</sup> to reduce over-penalizing entropy losses in solution. For the species that have multiple conformers, all of these were investigated and the conformer with the lowest electronic energy was included in the analysis.<sup>22,23</sup> The hindered internal rotation treatment was also applied to the single bonds to ensure that the obtained conformer has the lowest electronic energy.<sup>23,28</sup> All transition states were characterized by the existence of only one single imaginary frequency. Intrinsic coordinate calculations (IRCs) were performed to ensure that each transition state is connected correctly with the pre-complex and post-complex. The kinetic calculations were performed by the *Eyringpy* code<sup>29,30</sup>

**Table S2: The Cartesian coordinates and energies of CMs, ANIONS, TSs in the studied media (G: gas phase; P: pentyl ethanoate; H: water)**

| Name                  |             |             |             | CMA-G                                                                              |                             |
|-----------------------|-------------|-------------|-------------|------------------------------------------------------------------------------------|-----------------------------|
| Cartesian Coordinates |             |             |             | Energy                                                                             |                             |
| O                     | 0.08395500  | 1.22354200  | -0.04499100 | Zero-point correction=                                                             | 0.359109 (Hartree/Particle) |
| O                     | -1.11653100 | -1.31339600 | -0.34213000 | Thermal correction to Energy=                                                      | 0.383556                    |
| O                     | 1.01400800  | -2.85686400 | 0.68803600  | Thermal correction to Enthalpy=                                                    | 0.384500                    |
| O                     | -3.76529400 | -1.54519900 | -0.20653200 | Thermal correction to Gibbs Free Energy=                                           | 0.304077                    |
| O                     | -1.48017200 | 3.44836100  | 0.20367800  | Sum of electronic and zero-point Energies=                                         | -1374.218534                |
| O                     | 5.62901500  | -0.96540500 | 0.75873900  | Sum of electronic and thermal Energies=                                            | -1374.194087                |
| O                     | 6.27932900  | 0.85250200  | -1.04229900 | Sum of electronic and thermal Enthalpies=                                          | -1374.193142                |
| O                     | -5.49944000 | -2.91612300 | -0.27363300 | Sum of electronic and thermal Free Energies=                                       | -1374.273565                |
| C                     | 0.82894300  | 0.01794800  | 0.14942600  | 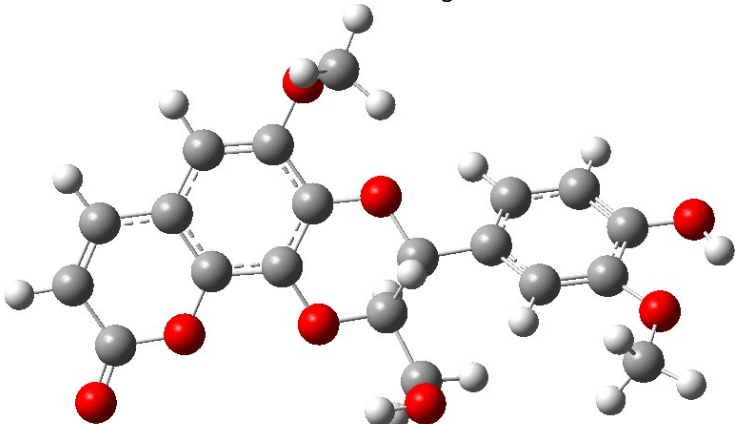 |                             |
| C                     | 0.23147600  | -1.06907300 | -0.74910000 |                                                                                    |                             |
| C                     | 2.27580700  | 0.29251100  | -0.15065000 |                                                                                    |                             |
| C                     | -1.85213600 | -0.18811400 | -0.14641500 |                                                                                    |                             |
| C                     | -1.26258400 | 1.06560600  | -0.01176000 |                                                                                    |                             |
| C                     | 0.93450400  | -2.40929900 | -0.65124500 |                                                                                    |                             |
| C                     | -3.24479200 | -0.29809700 | -0.08999100 |                                                                                    |                             |
| C                     | -2.06265600 | 2.21708300  | 0.14165200  |                                                                                    |                             |
| C                     | -4.04112000 | 0.83387900  | 0.06719200  |                                                                                    |                             |
| C                     | 3.24874300  | -0.46986700 | 0.50782700  |                                                                                    |                             |
| C                     | 2.65336600  | 1.23399800  | -1.09663800 |                                                                                    |                             |
| C                     | -3.43378400 | 2.09429000  | 0.17744800  |                                                                                    |                             |
| C                     | 4.58585800  | -0.28610700 | 0.20205100  |                                                                                    |                             |
| C                     | 4.00295300  | 1.42582500  | -1.39328400 |                                                                                    |                             |
| C                     | -5.46783200 | 0.62472500  | 0.09728300  |                                                                                    |                             |
| C                     | 4.96892400  | 0.67098500  | -0.75410000 |                                                                                    |                             |
| C                     | -5.98352700 | -0.61065400 | -0.01637100 |                                                                                    |                             |
| C                     | -5.12448900 | -1.78455200 | -0.17345800 |                                                                                    |                             |
| C                     | -0.78747300 | 3.71694800  | 1.42111300  |                                                                                    |                             |
| C                     | 5.31975200  | -1.96983100 | 1.70808400  |                                                                                    |                             |
| H                     | 0.70985500  | -0.30259200 | 1.19042800  |                                                                                    |                             |
| H                     | 0.23878200  | -0.70969600 | -1.78658900 |                                                                                    |                             |
| H                     | 0.39689900  | -3.12789200 | -1.27786100 |                                                                                    |                             |
| H                     | 1.95549100  | -2.31707300 | -1.02132000 |                                                                                    |                             |
| H                     | 2.93761600  | -1.21224900 | 1.23389000  |                                                                                    |                             |
| H                     | 1.89796700  | 1.83291700  | -1.58979800 |                                                                                    |                             |
| H                     | -4.03537200 | 2.98868000  | 0.28670300  |                                                                                    |                             |
| H                     | 4.32123800  | 2.16117000  | -2.12168600 |                                                                                    |                             |
| H                     | -6.11589300 | 1.48737800  | 0.21270400  |                                                                                    |                             |
| H                     | 0.11614400  | -3.02236500 | 0.99410400  |                                                                                    |                             |
| H                     | -7.04549800 | -0.81162600 | 0.00130400  |                                                                                    |                             |
| H                     | -0.41694700 | 4.73689500  | 1.34175700  |                                                                                    |                             |
| H                     | 0.05109200  | 3.03117300  | 1.55302700  |                                                                                    |                             |
| H                     | -1.47458800 | 3.64010800  | 2.26912700  |                                                                                    |                             |
| H                     | 6.79330500  | 0.24073400  | -0.50141800 |                                                                                    |                             |
| H                     | 4.82274200  | -1.53753900 | 2.58100500  |                                                                                    |                             |
| H                     | 4.67976000  | -2.73886900 | 1.26615600  |                                                                                    |                             |
| H                     | 6.26884300  | -2.40770600 | 2.00715200  |                                                                                    |                             |
| Name                  |             |             |             | CMB-G                                                                              |                             |
| Cartesian Coordinates |             |             |             | Energy                                                                             |                             |
| O                     | 0.07256800  | 0.31177600  | -0.28937800 | Zero-point correction=                                                             | 0.359150 (Hartree/Particle) |
| O                     | 1.04501500  | -2.28917600 | 0.19781000  | Thermal correction to Energy=                                                      | 0.383540                    |

|                       |             |             |             |                                              |                             |
|-----------------------|-------------|-------------|-------------|----------------------------------------------|-----------------------------|
| O                     | 1.77236600  | 2.35619800  | -0.41070600 | Thermal correction to Enthalpy=              | 0.384484                    |
| O                     | -0.95562500 | -3.72020300 | -1.15596400 | Thermal correction to Gibbs Free Energy=     | 0.304214                    |
| O                     | 3.72899200  | -2.73753200 | 0.32788900  | Sum of electronic and zero-point Energies=   | -1374.217304                |
| O                     | -4.42939700 | 1.92147100  | 1.20118600  | Sum of electronic and thermal Energies=      | -1374.192914                |
| O                     | -6.18160900 | 0.52212300  | -0.18833500 | Sum of electronic and thermal Enthalpies=    | -1374.191970                |
| O                     | 2.00941200  | 4.54322000  | -0.63820300 | Sum of electronic and thermal Free Energies= | -1374.272239                |
| C                     | -0.71922300 | -0.83868100 | -0.59388400 |                                              |                             |
| C                     | -0.33777900 | -1.95599500 | 0.38272100  |                                              |                             |
| C                     | -2.17035200 | -0.45145800 | -0.50290300 |                                              |                             |
| C                     | 1.39515900  | 0.05546300  | -0.14721900 |                                              |                             |
| C                     | 1.88337300  | -1.22773100 | 0.07738200  |                                              |                             |
| C                     | -1.08874400 | -3.25695400 | 0.17068200  |                                              |                             |
| C                     | 2.29930100  | 1.12039000  | -0.22723500 |                                              |                             |
| C                     | 3.26974800  | -1.46120100 | 0.17206200  |                                              |                             |
| C                     | 3.67117300  | 0.89926900  | -0.12791500 |                                              |                             |
| C                     | -2.56649700 | 0.59156500  | 0.33964900  |                                              |                             |
| C                     | -3.11991200 | -1.15344500 | -1.23481100 |                                              |                             |
| C                     | 4.14817300  | -0.40645800 | 0.06616800  |                                              |                             |
| C                     | -3.90973600 | 0.91713800  | 0.43778500  |                                              |                             |
| C                     | -4.47069400 | -0.83262000 | -1.12314600 |                                              |                             |
| C                     | 4.52541200  | 2.05613000  | -0.24243300 |                                              |                             |
| C                     | -4.87076100 | 0.19816600  | -0.29071200 |                                              |                             |
| C                     | 4.00274400  | 3.28055100  | -0.42138100 |                                              |                             |
| C                     | 2.55644400  | 3.48807600  | -0.50225700 |                                              |                             |
| C                     | 3.57185500  | -3.25331100 | 1.64671300  |                                              |                             |
| C                     | -3.51755500 | 2.75667800  | 1.89175200  |                                              |                             |
| H                     | -0.47938300 | -1.17462700 | -1.60837200 |                                              |                             |
| H                     | -0.48490500 | -1.59084800 | 1.40766500  |                                              |                             |
| H                     | -0.71187800 | -3.99384100 | 0.88862100  |                                              |                             |
| H                     | -2.15170100 | -3.10434400 | 0.35496300  |                                              |                             |
| H                     | -1.81408000 | 1.15418300  | 0.87560300  |                                              |                             |
| H                     | -2.80547200 | -1.95922500 | -1.89006000 |                                              |                             |
| H                     | 5.21197800  | -0.60144100 | 0.13085500  |                                              |                             |
| H                     | -5.22650300 | -1.36484400 | -1.68703800 |                                              |                             |
| H                     | 5.59962600  | 1.91541900  | -0.18121900 |                                              |                             |
| H                     | -0.02147700 | -3.89064500 | -1.31538200 |                                              |                             |
| H                     | 4.60570200  | 4.17329800  | -0.51063900 |                                              |                             |
| H                     | 3.97815000  | -4.26271400 | 1.63304500  |                                              |                             |
| H                     | 2.51734200  | -3.28498800 | 1.92935800  |                                              |                             |
| H                     | 4.13045800  | -2.64095600 | 2.36089100  |                                              |                             |
| H                     | -6.25703300 | 1.27566600  | 0.40968900  |                                              |                             |
| H                     | -4.11801600 | 3.50981000  | 2.39601800  |                                              |                             |
| H                     | -2.95111600 | 2.18425500  | 2.63173400  |                                              |                             |
| H                     | -2.82824400 | 3.23939500  | 1.19377600  |                                              |                             |
| <b>Name</b>           |             |             |             | <b>CMC-G</b>                                 |                             |
| Cartesian Coordinates |             |             |             | Energy                                       |                             |
| O                     | -0.13292900 | -2.21086700 | 0.43785400  | Zero-point correction=                       | 0.391894 (Hartree/Particle) |
| O                     | 1.39941600  | -0.14676600 | 1.60267800  | Thermal correction to Energy=                | 0.419069                    |
| O                     | 2.37179900  | -1.57807400 | 3.79718400  | Thermal correction to Enthalpy=              | 0.420013                    |
| O                     | 3.24585500  | 1.10096300  | 0.16986800  | Thermal correction to Gibbs Free Energy=     | 0.333301                    |
| O                     | 0.22808200  | -2.82507300 | -2.24046700 | Sum of electronic and zero-point Energies=   | -1488.687765                |
| O                     | -2.00975000 | 3.17412600  | 0.27776800  | Sum of electronic and thermal Energies=      | -1488.660590                |
| O                     | -5.03865300 | -0.39655800 | -0.25797200 | Sum of electronic and thermal Enthalpies=    | -1488.659646                |
| O                     | -4.37147600 | 2.29469700  | -0.48000800 | Sum of electronic and thermal Free Energies= | -1488.746358                |

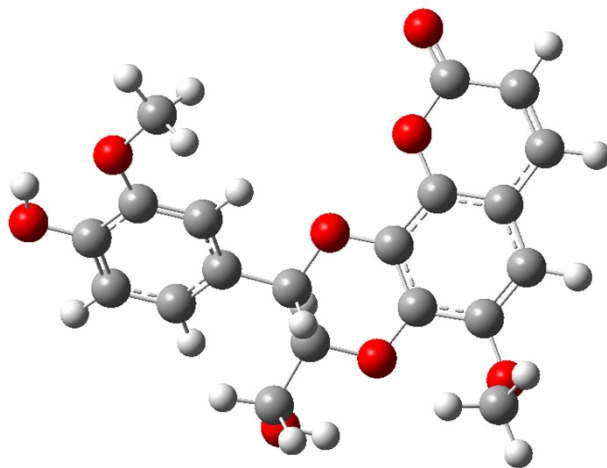

|   |             |             |             |
|---|-------------|-------------|-------------|
| O | 4.80175200  | 2.67181000  | 0.14118700  |
| C | -0.65710100 | -1.46266000 | 1.55222600  |
| C | 0.51353600  | -0.95762400 | 2.38828900  |
| C | -1.62906000 | -0.41184000 | 1.06123200  |
| C | 1.56202200  | -0.52925500 | 0.30710900  |
| C | 0.78996400  | -1.52467300 | -0.28586200 |
| C | 1.32777100  | -2.08785600 | 3.00389300  |
| C | 2.53311100  | 0.12602400  | -0.45311400 |
| C | 0.97164600  | -1.85801700 | -1.64258900 |
| C | -2.88042300 | -0.84095400 | 0.63355800  |
| C | -1.28796200 | 0.94031700  | 0.95624300  |
| C | 2.74659900  | -0.22487300 | -1.78409000 |
| C | 1.95505300  | -1.22137900 | -2.37139000 |
| C | -2.20950700 | 1.83449600  | 0.43013600  |
| C | -3.80411200 | 0.05507300  | 0.10403300  |
| C | -3.47377100 | 1.40572600  | 0.00593000  |
| C | 3.78203900  | 0.49462500  | -2.48587000 |
| C | 4.48737200  | 1.45811300  | -1.87018300 |
| C | 4.23318000  | 1.81795200  | -0.47477100 |
| C | -1.19244400 | -2.71226500 | -2.12851500 |
| C | -0.75132500 | 3.69989100  | 0.66705200  |
| C | -5.32874600 | -0.29313800 | -1.64969600 |
| H | -1.19963200 | -2.20768600 | 2.13688800  |
| H | 0.15448800  | -0.29677700 | 3.17989200  |
| H | 0.68874200  | -2.68231900 | 3.66005900  |
| H | 1.70706900  | -2.74150700 | 2.20798800  |
| H | -3.16951100 | -1.88403100 | 0.70368000  |
| H | -0.31785800 | 1.28925700  | 1.28120800  |
| H | 2.09313800  | -1.49611100 | -3.40990400 |
| H | 3.97870300  | 0.24018800  | -3.52221400 |
| H | 2.88953800  | -0.97422000 | 3.25405500  |
| H | 5.27057300  | 2.02055600  | -2.35889000 |
| H | -1.60355600 | -3.11240800 | -3.05446600 |
| H | -1.48978300 | -1.66602800 | -2.01219600 |
| H | -1.55793300 | -3.28504600 | -1.27694700 |
| H | -3.96569700 | 3.17041500  | -0.44780800 |
| H | -0.58178400 | 3.54838800  | 1.73623500  |
| H | -0.78810000 | 4.76425600  | 0.44961300  |
| H | 0.05735000  | 3.23435500  | 0.09700100  |
| H | -6.31894200 | -0.72290600 | -1.78637300 |
| H | -4.59765700 | -0.86631500 | -2.22904600 |
| H | -5.32898100 | 0.74779500  | -1.97524800 |

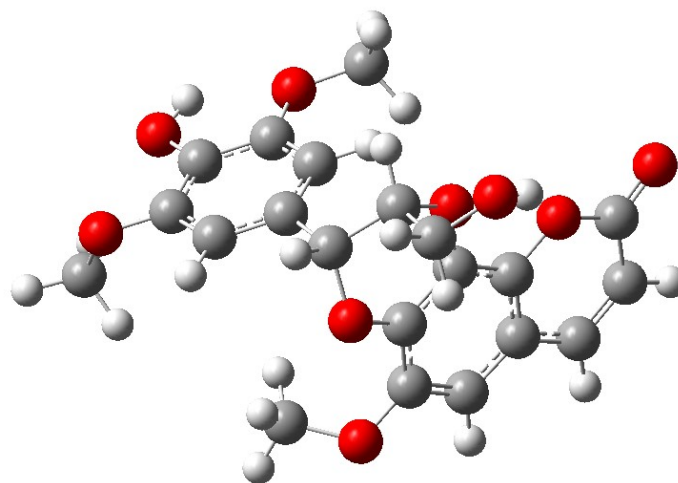

| Name                  |             |             |             | CMA-P                                        |                             |
|-----------------------|-------------|-------------|-------------|----------------------------------------------|-----------------------------|
| Cartesian Coordinates |             |             |             | Energy                                       |                             |
| O                     | 0.09574500  | 1.19540000  | -0.05276900 | Zero-point correction=                       | 0.358295 (Hartree/Particle) |
| O                     | -1.13200600 | -1.33200300 | -0.33025400 | Thermal correction to Energy=                | 0.382904                    |
| O                     | 0.98412600  | -2.89452700 | 0.72589800  | Thermal correction to Enthalpy=              | 0.383849                    |
| O                     | -3.78838700 | -1.52682800 | -0.20359200 | Thermal correction to Gibbs Free Energy=     | 0.302844                    |
| O                     | -1.42899400 | 3.42982900  | 0.19672800  | Sum of electronic and zero-point Energies=   | -1374.247999                |
| O                     | 5.65662800  | -0.84188400 | 0.83346800  | Sum of electronic and thermal Energies=      | -1374.223390                |
| O                     | 6.26929700  | 0.78922600  | -1.14735200 | Sum of electronic and thermal Enthalpies=    | -1374.222446                |
| O                     | -5.53000600 | -2.87810500 | -0.27233300 | Sum of electronic and thermal Free Energies= | -1374.303450                |
| C                     | 0.83538000  | -0.01803600 | 0.14317900  |                                              |                             |
| C                     | 0.22453000  | -1.11056900 | -0.73800800 |                                              |                             |

|   |             |             |             |
|---|-------------|-------------|-------------|
| C | 2.27817700  | 0.24806700  | -0.18529300 |
| C | -1.85271700 | -0.19796300 | -0.14550800 |
| C | -1.24948500 | 1.05030600  | -0.01717800 |
| C | 0.91308100  | -2.45574100 | -0.61867100 |
| C | -3.24678300 | -0.28584300 | -0.08936600 |
| C | -2.03776100 | 2.21130600  | 0.13209100  |
| C | -4.03168600 | 0.85437700  | 0.06522300  |
| C | 3.26728500  | -0.42561100 | 0.54120300  |
| C | 2.63536100  | 1.09315600  | -1.22693700 |
| C | -3.41022700 | 2.10884600  | 0.17113500  |
| C | 4.60176900  | -0.24847300 | 0.21409900  |
| C | 3.98027500  | 1.27946000  | -1.54859700 |
| C | -5.45951900 | 0.66401500  | 0.09861100  |
| C | 4.96178600  | 0.61271900  | -0.83767200 |
| C | -5.99119900 | -0.56681000 | -0.01210400 |
| C | -5.14539700 | -1.74326700 | -0.16980400 |
| C | -0.82463000 | 3.70732800  | 1.46230100  |
| C | 5.37159100  | -1.74307100 | 1.89534400  |
| H | 0.73327500  | -0.32069800 | 1.19056600  |
| H | 0.23633500  | -0.77433700 | -1.78251200 |
| H | 0.37403500  | -3.17649400 | -1.24197600 |
| H | 1.93548300  | -2.37850600 | -0.98918700 |
| H | 2.97737400  | -1.09263200 | 1.34432300  |
| H | 1.87029000  | 1.62236600  | -1.78211600 |
| H | -4.00674200 | 3.00692600  | 0.28262400  |
| H | 4.27726700  | 1.94275900  | -2.35245600 |
| H | -6.09640500 | 1.53502400  | 0.21398800  |
| H | 0.08364900  | -3.05434800 | 1.03042700  |
| H | -7.05689600 | -0.74987300 | 0.00842800  |
| H | -0.37321000 | 4.69470600  | 1.37997100  |
| H | -0.05195200 | 2.97227500  | 1.69725300  |
| H | -1.58492000 | 3.71534900  | 2.24919000  |
| H | 6.79781700  | 0.24466200  | -0.54899200 |
| H | 4.86237500  | -1.22790900 | 2.71427500  |
| H | 4.75892400  | -2.57730000 | 1.54221400  |
| H | 6.33310100  | -2.11600700 | 2.24134500  |

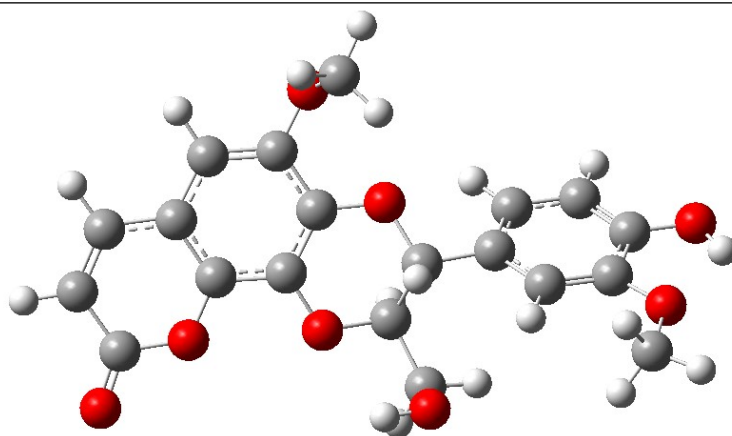

| Name                  |             |             |             | CMB-P                                        |                             |
|-----------------------|-------------|-------------|-------------|----------------------------------------------|-----------------------------|
| Cartesian Coordinates |             |             |             | Energy                                       |                             |
| O                     | 0.10107500  | 0.37070000  | -0.35582100 | Zero-point correction=                       | 0.358205 (Hartree/Particle) |
| O                     | 0.96068500  | -2.26818100 | 0.15932800  | Thermal correction to Energy=                | 0.382848                    |
| O                     | 1.89313700  | 2.34247700  | -0.45410700 | Thermal correction to Enthalpy=              | 0.383793                    |
| O                     | -1.03446800 | -3.63190700 | -1.27824300 | Thermal correction to Gibbs Free Energy=     | 0.302254                    |
| O                     | 3.60728700  | -2.81656100 | 0.40863500  | Sum of electronic and zero-point Energies=   | -1374.247414                |
| O                     | -4.45810200 | 1.68808800  | 1.47987200  | Sum of electronic and thermal Energies=      | -1374.222770                |
| O                     | -6.15688300 | 0.73366700  | -0.29226200 | Sum of electronic and thermal Enthalpies=    | -1374.221826                |
| O                     | 2.22072900  | 4.50772600  | -0.71821100 | Sum of electronic and thermal Free Energies= | -1374.303365                |
| C                     | -0.72878100 | -0.75366200 | -0.68227600 |                                              |                             |
| C                     | -0.41734600 | -1.88958200 | 0.29539500  |                                              |                             |
| C                     | -2.16439300 | -0.31624200 | -0.60729500 |                                              |                             |
| C                     | 1.40752800  | 0.06133000  | -0.17364300 |                                              |                             |
| C                     | 1.83783400  | -1.23935900 | 0.07246800  |                                              |                             |
| C                     | -1.20969200 | -3.15756900 | 0.04236800  |                                              |                             |
| C                     | 2.35874000  | 1.08529700  | -0.23355800 |                                              |                             |
| C                     | 3.21087000  | -1.52434100 | 0.22211100  |                                              |                             |

|   |             |             |             |
|---|-------------|-------------|-------------|
| C | 3.71649200  | 0.81408200  | -0.08023900 |
| C | -2.58286600 | 0.52117400  | 0.43389500  |
| C | -3.08593600 | -0.79181600 | -1.52964200 |
| C | 4.13516800  | -0.50705900 | 0.14449000  |
| C | -3.91898000 | 0.87455800  | 0.53289000  |
| C | -4.43261500 | -0.44484300 | -1.42268400 |
| C | 4.62009500  | 1.93307400  | -0.17190700 |
| C | -4.85190200 | 0.38421900  | -0.39795100 |
| C | 4.15395500  | 3.17611000  | -0.38756200 |
| C | 2.72647500  | 3.43241600  | -0.53441800 |
| C | 3.40559700  | -3.29081600 | 1.74163800  |
| C | -3.57307800 | 2.27720500  | 2.42289000  |
| H | -0.48516500 | -1.08653000 | -1.69613700 |
| H | -0.59031600 | -1.53753800 | 1.32026000  |
| H | -0.90194400 | -3.90956100 | 0.77700900  |
| H | -2.27302200 | -2.95929500 | 0.17849100  |
| H | -1.85651400 | 0.90564300  | 1.13887700  |
| H | -2.75841400 | -1.44158000 | -2.33368700 |
| H | 5.18876300  | -0.73552800 | 0.25691200  |
| H | -5.16376200 | -0.80513900 | -2.13661700 |
| H | 5.68430200  | 1.75045300  | -0.06365000 |
| H | -0.10322800 | -3.85511700 | -1.38863000 |
| H | 4.79967400  | 4.04055600  | -0.46112600 |
| H | 3.74214500  | -4.32619300 | 1.75720000  |
| H | 2.34947300  | -3.24558900 | 2.01740500  |
| H | 3.99950700  | -2.70092400 | 2.44612900  |
| H | -6.24957700 | 1.32837400  | 0.46384900  |
| H | -4.18897500 | 2.90294300  | 3.06513500  |
| H | -3.07999100 | 1.50918200  | 3.02491800  |
| H | -2.82362300 | 2.89271000  | 1.91831100  |

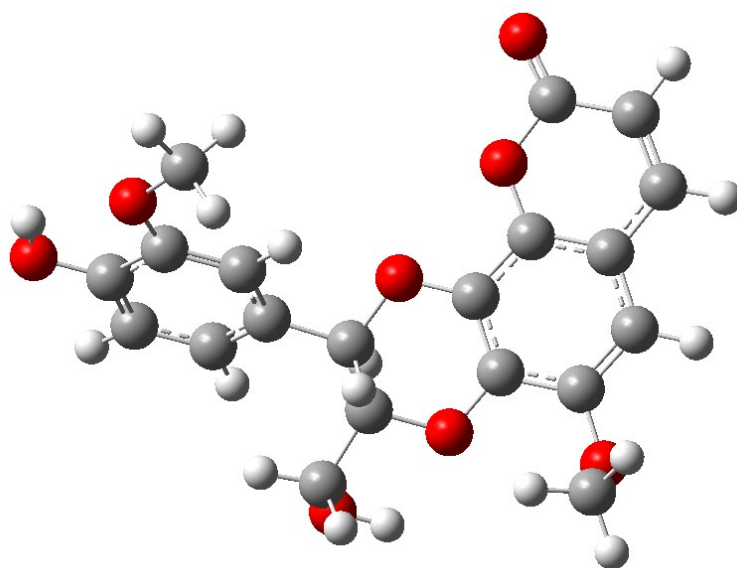

| Name                  |             |             |             | CMC-P                                        |                             |
|-----------------------|-------------|-------------|-------------|----------------------------------------------|-----------------------------|
| Cartesian Coordinates |             |             |             | Energy                                       |                             |
| O                     | -0.12427600 | -2.12104800 | 0.71019500  | Zero-point correction=                       | 0.391050 (Hartree/Particle) |
| O                     | 1.37177500  | 0.10588600  | 1.61349100  | Thermal correction to Energy=                | 0.417458                    |
| O                     | 2.33886000  | -1.02442400 | 3.99542000  | Thermal correction to Enthalpy=              | 0.418402                    |
| O                     | 3.23635600  | 1.15776400  | 0.04222900  | Thermal correction to Gibbs Free Energy=     | 0.334685                    |
| O                     | 0.34163800  | -3.16360900 | -1.75546100 | Sum of electronic and zero-point Energies=   | -1488.719027                |
| O                     | -2.12323100 | 3.17544500  | -0.10093300 | Sum of electronic and thermal Energies=      | -1488.692618                |
| O                     | -5.06439600 | -0.49301500 | -0.22387500 | Sum of electronic and thermal Enthalpies=    | -1488.691674                |
| O                     | -4.45932300 | 2.14921900  | -0.75927100 | Sum of electronic and thermal Free Energies= | -1488.775392                |
| O                     | 4.77052500  | 2.72739500  | -0.17398900 |                                              |                             |
| C                     | -0.66484500 | -1.24362300 | 1.72137800  |                                              |                             |
| C                     | 0.48889700  | -0.61282300 | 2.49254600  |                                              |                             |
| C                     | -1.65491500 | -0.28339800 | 1.09610300  |                                              |                             |
| C                     | 1.56901800  | -0.45886000 | 0.39359900  |                                              |                             |
| C                     | 0.82546500  | -1.54327400 | -0.06386500 |                                              |                             |
| C                     | 1.30690000  | -1.64343000 | 3.25710900  |                                              |                             |
| C                     | 2.54865300  | 0.08880900  | -0.44007300 |                                              |                             |
| C                     | 1.06868100  | -2.08664100 | -1.34204000 |                                              |                             |
| C                     | -2.89613700 | -0.79168100 | 0.72521000  |                                              |                             |
| C                     | -1.34774700 | 1.05515400  | 0.83141000  |                                              |                             |
| C                     | 2.80258200  | -0.44970500 | -1.69929900 |                                              |                             |
| C                     | 2.05128700  | -1.54911600 | -2.14304800 |                                              |                             |
| C                     | -2.28914900 | 1.86133800  | 0.20476900  |                                              |                             |



|   |             |             |             |
|---|-------------|-------------|-------------|
| C | -3.83725400 | 0.01522700  | 0.09303000  |
| C | -3.54010200 | 1.35139800  | -0.16736600 |
| C | 3.84014100  | 0.17605400  | -2.47953000 |
| C | 4.51638000  | 1.23515100  | -1.99925400 |
| C | 4.22505700  | 1.78292700  | -0.68039200 |
| C | -0.98610600 | -2.82534500 | -2.16572300 |
| C | -0.88075300 | 3.78057500  | 0.23676600  |
| C | -5.27024200 | -0.67162100 | -1.62612000 |
| H | -1.19709100 | -1.91475000 | 2.39671900  |
| H | 0.10641600  | 0.13749600  | 3.18672500  |
| H | 0.66111900  | -2.15472200 | 3.97338900  |
| H | 1.71127200  | -2.39049300 | 2.56266700  |
| H | -3.15749100 | -1.82602400 | 0.92363200  |
| H | -0.39101000 | 1.46913500  | 1.11734900  |
| H | 2.23454100  | -1.97887400 | -3.12112300 |
| H | 4.06410400  | -0.22511000 | -3.46249400 |
| H | 2.87963300  | -0.51787500 | 3.37878900  |
| H | 5.30043500  | 1.73194200  | -2.55428000 |
| H | -1.48314200 | -3.76195600 | -2.41393500 |
| H | -0.95366100 | -2.17993100 | -3.04888500 |
| H | -1.52864500 | -2.32308200 | -1.36096400 |
| H | -4.07509000 | 3.03246300  | -0.84546100 |
| H | -0.71565200 | 3.75122300  | 1.31694100  |
| H | -0.94984400 | 4.81447100  | -0.09375500 |
| H | -0.05434200 | 3.28446700  | -0.27971300 |
| H | -6.27510600 | -1.07452700 | -1.74324000 |
| H | -4.54178300 | -1.38366000 | -2.02704800 |
| H | -5.19296100 | 0.27821700  | -2.15900200 |

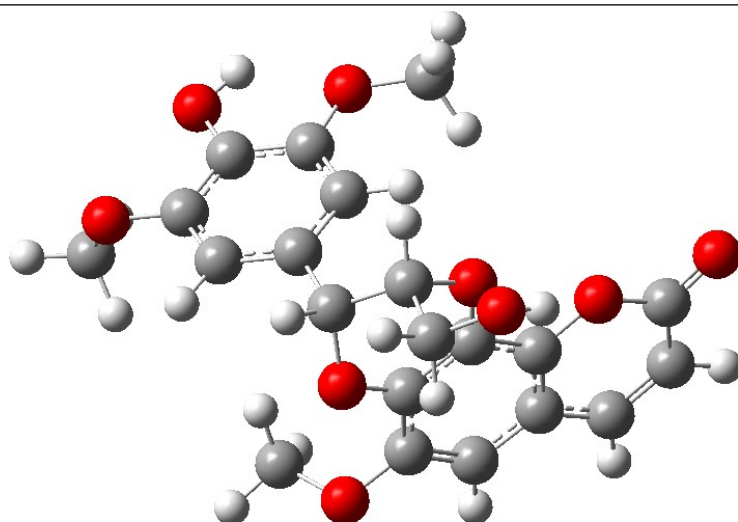

| Name                  |             |             |             | CMA-H                                        |                             |
|-----------------------|-------------|-------------|-------------|----------------------------------------------|-----------------------------|
| Cartesian Coordinates |             |             |             | Energy                                       |                             |
| O                     | 0.12543400  | 1.13834800  | -0.11291400 | Zero-point correction=                       | 0.357311 (Hartree/Particle) |
| O                     | -1.16903600 | -1.37546600 | -0.28016300 | Thermal correction to Energy=                | 0.381993                    |
| O                     | 0.98010400  | -2.94601400 | 0.80690700  | Thermal correction to Enthalpy=              | 0.382937                    |
| O                     | -3.82745900 | -1.49254200 | -0.13741600 | Thermal correction to Gibbs Free Energy=     | 0.301757                    |
| O                     | -1.32494700 | 3.40964300  | 0.07995700  | Sum of electronic and zero-point Energies=   | -1374.251454                |
| O                     | 5.68444900  | -0.54318900 | 1.01414600  | Sum of electronic and thermal Energies=      | -1374.226772                |
| O                     | 6.25732400  | 0.57934500  | -1.33147800 | Sum of electronic and thermal Enthalpies=    | -1374.225828                |
| O                     | -5.59577800 | -2.80382600 | -0.15987000 | Sum of electronic and thermal Free Energies= | -1374.307008                |
| C                     | 0.83935800  | -0.09168100 | 0.12292200  |                                              |                             |
| C                     | 0.19258100  | -1.20144600 | -0.70616700 |                                              |                             |
| C                     | 2.27772200  | 0.12669800  | -0.24984200 |                                              |                             |
| C                     | -1.85737400 | -0.21169600 | -0.13562300 |                                              |                             |
| C                     | -1.22405900 | 1.02427300  | -0.05949800 |                                              |                             |
| C                     | 0.86395800  | -2.55033800 | -0.55152500 |                                              |                             |
| C                     | -3.25037300 | -0.25585000 | -0.06686500 |                                              |                             |
| C                     | -1.98579100 | 2.20462700  | 0.05322700  |                                              |                             |
| C                     | -4.01055200 | 0.90424300  | 0.05189800  |                                              |                             |
| C                     | 3.28365200  | -0.30455800 | 0.62019100  |                                              |                             |
| C                     | 2.61015400  | 0.69729000  | -1.47288700 |                                              |                             |
| C                     | -3.35863400 | 2.14685100  | 0.10915600  |                                              |                             |
| C                     | 4.61582600  | -0.16210900 | 0.25850600  |                                              |                             |
| C                     | 3.94798300  | 0.85229200  | -1.83075600 |                                              |                             |
| C                     | -5.44020100 | 0.74930100  | 0.09564900  |                                              |                             |
| C                     | 4.94675200  | 0.42427800  | -0.97362200 |                                              |                             |

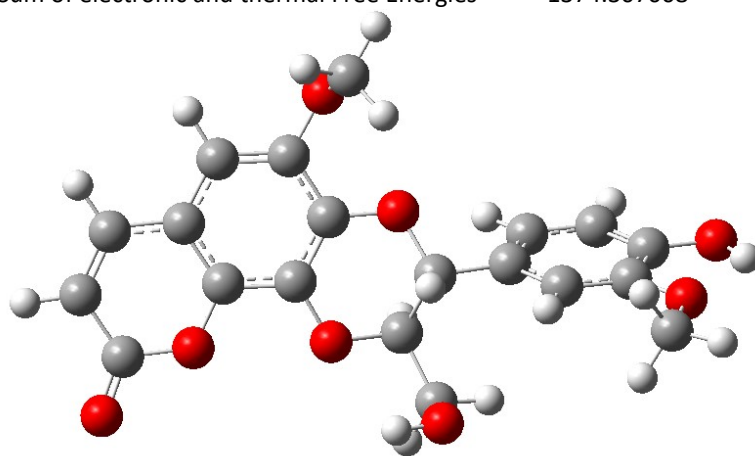



|                       |             |             |             |                                                           |
|-----------------------|-------------|-------------|-------------|-----------------------------------------------------------|
| C                     | -6.00398800 | -0.47249200 | 0.02503900  |                                                           |
| C                     | -5.18733500 | -1.66325000 | -0.09409000 |                                                           |
| C                     | -0.83835900 | 3.75100000  | 1.38681400  |                                                           |
| C                     | 5.41011600  | -1.15485100 | 2.27232900  |                                                           |
| H                     | 0.74644300  | -0.33788800 | 1.18440300  |                                                           |
| H                     | 0.19522900  | -0.90756900 | -1.76224400 |                                                           |
| H                     | 0.29490500  | -3.28805600 | -1.12430500 |                                                           |
| H                     | 1.87336200  | -2.49782300 | -0.95998900 |                                                           |
| H                     | 3.01505300  | -0.74911100 | 1.57077700  |                                                           |
| H                     | 1.83044600  | 1.02980700  | -2.14848900 |                                                           |
| H                     | -3.93335600 | 3.06139100  | 0.19722200  |                                                           |
| H                     | 4.22792000  | 1.30269900  | -2.77582900 |                                                           |
| H                     | -6.05430600 | 1.63900300  | 0.18434200  |                                                           |
| H                     | 0.09208700  | -3.08599200 | 1.15707900  |                                                           |
| H                     | -7.07349400 | -0.62827400 | 0.05402400  |                                                           |
| H                     | -0.30567800 | 4.69418900  | 1.28262200  |                                                           |
| H                     | -0.15851200 | 2.98012400  | 1.75620200  |                                                           |
| H                     | -1.67775300 | 3.87044600  | 2.07592500  |                                                           |
| H                     | 6.81893200  | 0.23854800  | -0.62099300 |                                                           |
| H                     | 4.86838000  | -0.46568800 | 2.92403700  |                                                           |
| H                     | 4.83272600  | -2.07195200 | 2.13485100  |                                                           |
| H                     | 6.37827200  | -1.38974800 | 2.70786800  |                                                           |
| <b>Name</b>           |             |             |             | <b>CMB-H</b>                                              |
| Cartesian Coordinates |             |             |             | Energy                                                    |
| O                     | 0.12785900  | 0.42400800  | -0.38233700 | Zero-point correction= 0.357338 (Hartree/Particle)        |
| O                     | 0.91456100  | -2.25944400 | 0.06719500  | Thermal correction to Energy= 0.382005                    |
| O                     | 1.97772900  | 2.34120300  | -0.41296100 | Thermal correction to Enthalpy= 0.382950                  |
| O                     | -1.25464800 | -3.49808400 | -1.37631800 | Thermal correction to Gibbs Free Energy= 0.301866         |
| O                     | 3.52705500  | -2.89027800 | 0.34314400  | Sum of electronic and zero-point Energies= -1374.251610   |
| O                     | -4.50772000 | 1.43387200  | 1.66617700  | Sum of electronic and thermal Energies= -1374.226943      |
| O                     | -6.12815000 | 0.94480500  | -0.38200700 | Sum of electronic and thermal Enthalpies= -1374.225999    |
| O                     | 2.35806400  | 4.49840700  | -0.63089000 | Sum of electronic and thermal Free Energies= -1374.307082 |
| C                     | -0.73043900 | -0.67916900 | -0.73619400 |                                                           |
| C                     | -0.45148600 | -1.83722100 | 0.22194200  |                                                           |
| C                     | -2.15283300 | -0.20669200 | -0.66160900 |                                                           |
| C                     | 1.42705800  | 0.06734300  | -0.19331900 |                                                           |
| C                     | 1.81755000  | -1.25034600 | 0.01999700  |                                                           |
| C                     | -1.30973700 | -3.05976600 | -0.02748900 |                                                           |
| C                     | 2.40804600  | 1.05998500  | -0.21170500 |                                                           |
| C                     | 3.18049800  | -1.57007800 | 0.18028600  |                                                           |
| C                     | 3.75559500  | 0.75586700  | -0.04091100 |                                                           |
| C                     | -2.61241100 | 0.41875900  | 0.50468600  |                                                           |
| C                     | -3.02282000 | -0.43873000 | -1.71731900 |                                                           |
| C                     | 4.13659600  | -0.58203700 | 0.15254800  |                                                           |
| C                     | -3.93845700 | 0.81001400  | 0.59644200  |                                                           |
| C                     | -4.36063400 | -0.05423600 | -1.62124800 |                                                           |
| C                     | 4.68525600  | 1.85308800  | -0.08187900 |                                                           |
| C                     | -4.81787200 | 0.56524700  | -0.47312700 |                                                           |
| C                     | 4.25498900  | 3.11502700  | -0.27633800 |                                                           |
| C                     | 2.84584000  | 3.40198900  | -0.45164200 |                                                           |
| C                     | 3.39437600  | -3.33980000 | 1.70012200  |                                                           |
| C                     | -3.66752400 | 1.71381600  | 2.78330700  |                                                           |
| H                     | -0.48355500 | -0.98990700 | -1.75501100 |                                                           |
| H                     | -0.59398800 | -1.49360100 | 1.25312700  |                                                           |

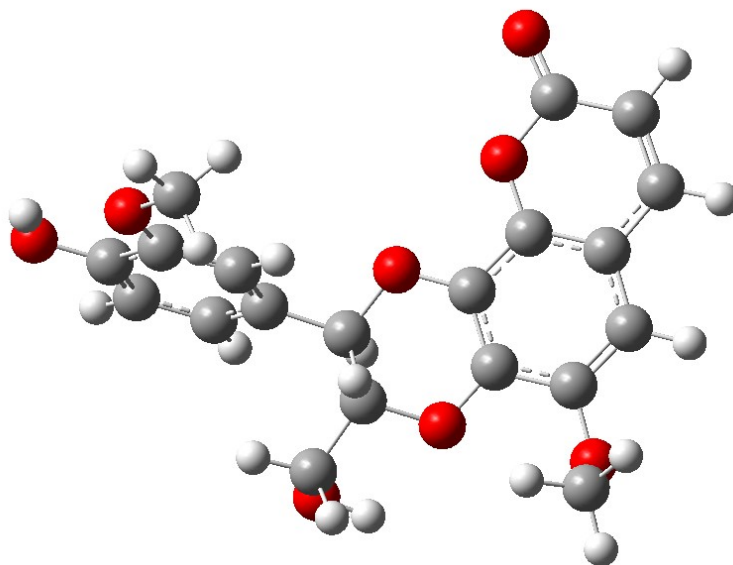

|                       |             |             |             |                                                           |
|-----------------------|-------------|-------------|-------------|-----------------------------------------------------------|
| H                     | -0.98896800 | -3.85349600 | 0.65315400  |                                                           |
| H                     | -2.34981900 | -2.81591900 | 0.19015900  |                                                           |
| H                     | -1.92782100 | 0.59968500  | 1.32440400  |                                                           |
| H                     | -2.66278400 | -0.92177300 | -2.61853500 |                                                           |
| H                     | 5.18143600  | -0.83894600 | 0.28226300  |                                                           |
| H                     | -5.05454600 | -0.22606700 | -2.43558300 |                                                           |
| H                     | 5.74122700  | 1.64118600  | 0.04744200  |                                                           |
| H                     | -0.36382600 | -3.82301400 | -1.55266600 |                                                           |
| H                     | 4.92323600  | 3.96429100  | -0.31134100 |                                                           |
| H                     | 3.65253400  | -4.39693500 | 1.70313300  |                                                           |
| H                     | 2.36788700  | -3.20792000 | 2.04929800  |                                                           |
| H                     | 4.08201100  | -2.78607400 | 2.34374100  |                                                           |
| H                     | -6.27375600 | 1.36078500  | 0.47959200  |                                                           |
| H                     | -4.29942100 | 2.21059300  | 3.51546700  |                                                           |
| H                     | -3.26908300 | 0.78827200  | 3.20506700  |                                                           |
| H                     | -2.84831800 | 2.37460000  | 2.49096300  |                                                           |
| <b>Name</b>           |             |             |             | <b>CMC-H</b>                                              |
| Cartesian Coordinates |             |             |             | Energy                                                    |
| O                     | -0.20490800 | -1.75587200 | 1.30828100  | Zero-point correction= 0.390372 (Hartree/Particle)        |
| O                     | 1.30624800  | 0.64195000  | 1.45369800  | Thermal correction to Energy= 0.417699                    |
| O                     | 2.28314500  | 0.25077000  | 4.08286600  | Thermal correction to Enthalpy= 0.418644                  |
| O                     | 3.21618800  | 1.09560800  | -0.33497500 | Thermal correction to Gibbs Free Energy= 0.330051         |
| O                     | 0.28808300  | -3.55936500 | -0.64638600 | Sum of electronic and zero-point Energies= -1488.728082   |
| O                     | -2.28230200 | 3.32121300  | -0.74001500 | Sum of electronic and thermal Energies= -1488.700755      |
| O                     | -4.71898400 | -0.63057200 | -0.90487400 | Sum of electronic and thermal Enthalpies= -1488.699810    |
| O                     | -4.32607400 | 1.87279800  | -1.64981000 | Sum of electronic and thermal Free Energies= -1488.788403 |
| O                     | 4.78566200  | 2.48595800  | -1.00540300 |                                                           |
| C                     | -0.73220400 | -0.58461500 | 1.97288400  |                                                           |
| C                     | 0.43051100  | 0.23201600  | 2.52017000  |                                                           |
| C                     | -1.66907300 | 0.14482500  | 1.02891600  |                                                           |
| C                     | 1.51452800  | -0.29740900 | 0.49256800  |                                                           |
| C                     | 0.76986500  | -1.46965200 | 0.40527100  |                                                           |
| C                     | 1.23093200  | -0.54112200 | 3.55654500  |                                                           |
| C                     | 2.51373000  | -0.07037700 | -0.45540000 |                                                           |
| C                     | 1.03562700  | -2.40603900 | -0.61236700 |                                                           |
| C                     | -2.75610700 | -0.58499900 | 0.54401100  |                                                           |
| C                     | -1.46807700 | 1.46279600  | 0.62899600  |                                                           |
| C                     | 2.78463600  | -0.99133200 | -1.46302100 |                                                           |
| C                     | 2.03039500  | -2.17362100 | -1.53339700 |                                                           |
| C                     | -2.36569000 | 2.04439600  | -0.26557800 |                                                           |
| C                     | -3.64022200 | -0.00389400 | -0.35849900 |                                                           |
| C                     | -3.44600500 | 1.31897700  | -0.76348200 |                                                           |
| C                     | 3.84380500  | -0.66545800 | -2.38109400 |                                                           |
| C                     | 4.53213800  | 0.48587000  | -2.25853500 |                                                           |
| C                     | 4.22668200  | 1.42671500  | -1.19975800 |                                                           |
| C                     | -0.95833000 | -3.38655700 | -1.33963300 |                                                           |
| C                     | -1.17723500 | 4.11220000  | -0.30773900 |                                                           |
| C                     | -4.90987700 | -2.00220600 | -0.56639600 |                                                           |
| H                     | -1.29649500 | -0.98721900 | 2.81468000  |                                                           |
| H                     | 0.06336100  | 1.15897600  | 2.96158000  |                                                           |
| H                     | 0.57279800  | -0.79898300 | 4.38723900  |                                                           |
| H                     | 1.62629000  | -1.46578800 | 3.12302200  |                                                           |
| H                     | -2.89627100 | -1.60744500 | 0.87119400  |                                                           |
| H                     | -0.62874700 | 2.03614200  | 0.99594000  |                                                           |

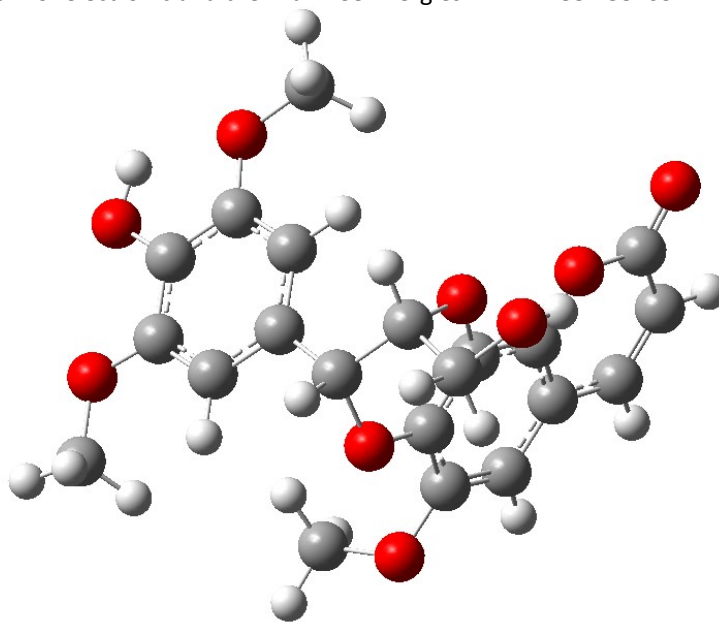

|                       |             |             |             |                                                           |
|-----------------------|-------------|-------------|-------------|-----------------------------------------------------------|
| H                     | 2.22504600  | -2.90016800 | -2.31356300 |                                                           |
| H                     | 4.07503400  | -1.36815100 | -3.17429800 |                                                           |
| H                     | 2.90020300  | 0.44109700  | 3.36605700  |                                                           |
| H                     | 5.33369300  | 0.76479100  | -2.92837400 |                                                           |
| H                     | -1.51429900 | -4.31448000 | -1.21875100 |                                                           |
| H                     | -0.76998800 | -3.19791300 | -2.39944700 |                                                           |
| H                     | -1.52112300 | -2.55533000 | -0.90874800 |                                                           |
| H                     | -4.04185500 | 2.77878700  | -1.83765100 |                                                           |
| H                     | -1.20127600 | 4.24789100  | 0.77580300  |                                                           |
| H                     | -1.28902400 | 5.07442800  | -0.80154700 |                                                           |
| H                     | -0.23354900 | 3.64988100  | -0.60645400 |                                                           |
| H                     | -5.78903900 | -2.32477700 | -1.11923100 |                                                           |
| H                     | -5.08717700 | -2.11626400 | 0.50553200  |                                                           |
| H                     | -4.04421400 | -2.59848900 | -0.86679900 |                                                           |
| <b>Name</b>           |             |             |             | <b>CMA-anion</b>                                          |
| Cartesian Coordinates |             |             |             | Energy                                                    |
| O                     | 0.16898800  | 1.10195300  | 0.16610900  | Zero-point correction= 0.344559 (Hartree/Particle)        |
| O                     | -1.15329500 | -1.32229400 | -0.46247300 | Thermal correction to Energy= 0.368748                    |
| O                     | 0.95917700  | -3.09724800 | 0.29009000  | Thermal correction to Enthalpy= 0.369692                  |
| O                     | -3.80639800 | -1.45775100 | -0.26082600 | Thermal correction to Gibbs Free Energy= 0.289524         |
| O                     | -1.26008700 | 3.29841700  | 0.85205200  | Sum of electronic and zero-point Energies= -1373.792021   |
| O                     | 5.70664800  | -0.66594300 | 1.10557900  | Sum of electronic and thermal Energies= -1373.767833      |
| O                     | 6.32176300  | 0.71557900  | -1.10450500 | Sum of electronic and thermal Enthalpies= -1373.766888    |
| O                     | -5.58372900 | -2.74062400 | -0.46196700 | Sum of electronic and thermal Free Energies= -1373.847056 |
| C                     | 0.88118400  | -0.15992100 | 0.15462200  |                                                           |
| C                     | 0.20931700  | -1.08271400 | -0.86043300 |                                                           |
| C                     | 2.31642800  | 0.11356100  | -0.17155300 |                                                           |
| C                     | -1.82670700 | -0.20325100 | -0.08628300 |                                                           |
| C                     | -1.17969300 | 0.99318000  | 0.20636800  |                                                           |
| C                     | 0.86117200  | -2.44555300 | -0.96754600 |                                                           |
| C                     | -3.21706800 | -0.25691000 | 0.01962200  |                                                           |
| C                     | -1.92993900 | 2.13467800  | 0.55847200  |                                                           |
| C                     | -3.96318700 | 0.85865400  | 0.38885400  |                                                           |
| C                     | 3.32965200  | -0.39446000 | 0.65708400  |                                                           |
| C                     | 2.67247200  | 0.81684600  | -1.31669100 |                                                           |
| C                     | -3.30053500 | 2.06950900  | 0.64821100  |                                                           |
| C                     | 4.66256600  | -0.19869100 | 0.33993100  |                                                           |
| C                     | 4.01341800  | 1.02345100  | -1.63141000 |                                                           |
| C                     | -5.38958000 | 0.69520700  | 0.47145800  |                                                           |
| C                     | 5.06690500  | 0.52974400  | -0.82885700 |                                                           |
| C                     | -5.96505800 | -0.49225800 | 0.19787000  |                                                           |
| C                     | -5.16384200 | -1.63463400 | -0.19051400 |                                                           |
| C                     | -0.81890700 | 4.00516500  | -0.31710900 |                                                           |
| C                     | 5.37521900  | -1.41616700 | 2.26388100  |                                                           |
| H                     | 0.78621500  | -0.60143100 | 1.15079400  |                                                           |
| H                     | 0.20664100  | -0.59741000 | -1.84321300 |                                                           |
| H                     | 0.28695500  | -3.05159000 | -1.67438400 |                                                           |
| H                     | 1.87472300  | -2.32950200 | -1.35128200 |                                                           |
| H                     | 3.04912000  | -0.94314300 | 1.54892500  |                                                           |
| H                     | 1.90003500  | 1.21592000  | -1.96784300 |                                                           |
| H                     | -3.86453600 | 2.95150300  | 0.92813300  |                                                           |
| H                     | 4.28438400  | 1.58237900  | -2.52164700 |                                                           |
| H                     | -5.99230400 | 1.55017900  | 0.75863900  |                                                           |
| H                     | 0.06460800  | -3.25631100 | 0.61461700  |                                                           |

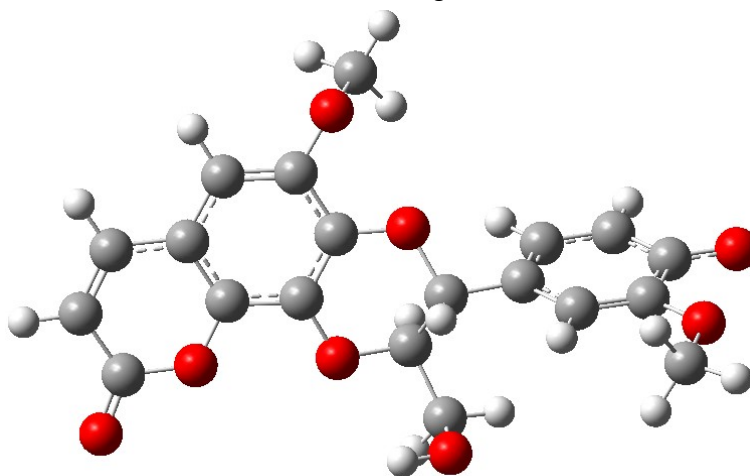

|                       |             |             |             |                                                           |
|-----------------------|-------------|-------------|-------------|-----------------------------------------------------------|
| H                     | -7.03295800 | -0.65317100 | 0.24918200  |                                                           |
| H                     | -0.28534400 | 4.88519700  | 0.03641700  |                                                           |
| H                     | -1.68229800 | 4.30749600  | -0.91463000 |                                                           |
| H                     | -0.14979100 | 3.38269900  | -0.91504500 |                                                           |
| H                     | 4.80077900  | -0.81328300 | 2.97285200  |                                                           |
| H                     | 4.80566900  | -2.31249800 | 2.00199600  |                                                           |
| H                     | 6.32067700  | -1.70636600 | 2.71814100  |                                                           |
| <b>Name</b>           |             |             |             | <b>CMB-anion</b>                                          |
| Cartesian Coordinates |             |             |             | Energy                                                    |
| O                     | -0.11792700 | -0.47028400 | -0.32266200 | Zero-point correction= 0.344500 (Hartree/Particle)        |
| O                     | -0.85477800 | 2.24102500  | 0.03836300  | Thermal correction to Energy= 0.368736                    |
| O                     | -2.01071700 | -2.34912700 | -0.32376700 | Thermal correction to Enthalpy= 0.369680                  |
| O                     | 1.31888800  | 3.39423400  | -1.46330300 | Thermal correction to Gibbs Free Energy= 0.289075         |
| O                     | -3.45540800 | 2.93425200  | 0.25785700  | Sum of electronic and zero-point Energies= -1373.792099   |
| O                     | 4.61826100  | -1.27817100 | 1.74997600  | Sum of electronic and thermal Energies= -1373.767863      |
| O                     | 6.14599800  | -1.09801300 | -0.44300200 | Sum of electronic and thermal Enthalpies= -1373.766918    |
| O                     | -2.43608100 | -4.50240300 | -0.49087200 | Sum of electronic and thermal Free Energies= -1373.847524 |
| C                     | 0.76582900  | 0.60706700  | -0.72300700 |                                                           |
| C                     | 0.50742700  | 1.79879200  | 0.19698800  |                                                           |
| C                     | 2.17675700  | 0.11528300  | -0.66612400 |                                                           |
| C                     | -1.41104000 | -0.08261900 | -0.16089100 |                                                           |
| C                     | -1.77647500 | 1.24947200  | 0.00766800  |                                                           |
| C                     | 1.38106900  | 2.99940900  | -0.10073600 |                                                           |
| C                     | -2.41469000 | -1.05287500 | -0.16558300 |                                                           |
| C                     | -3.13471800 | 1.60262900  | 0.13739800  |                                                           |
| C                     | -3.75813200 | -0.71489500 | -0.02736500 |                                                           |
| C                     | 2.71092900  | -0.37524300 | 0.54059500  |                                                           |
| C                     | 2.99712000  | 0.18855800  | -1.78239600 |                                                           |
| C                     | -4.11251900 | 0.63585600  | 0.12197100  |                                                           |
| C                     | 4.02991800  | -0.78185200 | 0.60952600  |                                                           |
| C                     | 4.33046500  | -0.21377800 | -1.71299800 |                                                           |
| C                     | -4.71145300 | -1.79152600 | -0.05713800 |                                                           |
| C                     | 4.90914500  | -0.71480000 | -0.52715500 |                                                           |
| C                     | -4.30681100 | -3.06766600 | -0.21018500 |                                                           |
| C                     | -2.90171100 | -3.39048600 | -0.35059500 |                                                           |
| C                     | -3.32554700 | 3.42057600  | 1.60217100  |                                                           |
| C                     | 3.80799700  | -1.36121600 | 2.91246100  |                                                           |
| H                     | 0.50301800  | 0.88842600  | -1.74692800 |                                                           |
| H                     | 0.65050400  | 1.49292800  | 1.23965900  |                                                           |
| H                     | 1.07989800  | 3.82140700  | 0.55512800  |                                                           |
| H                     | 2.41921000  | 2.74561600  | 0.11394200  |                                                           |
| H                     | 2.07177900  | -0.43685300 | 1.41400500  |                                                           |
| H                     | 2.59622600  | 0.56780800  | -2.71761600 |                                                           |
| H                     | -5.15332300 | 0.91924300  | 0.22650700  |                                                           |
| H                     | 4.96429900  | -0.15434600 | -2.59210600 |                                                           |
| H                     | -5.76458300 | -1.55273100 | 0.04591000  |                                                           |
| H                     | 0.42984100  | 3.72250700  | -1.64200400 |                                                           |
| H                     | -4.99357000 | -3.90235900 | -0.23646000 |                                                           |
| H                     | -3.56144800 | 4.48252800  | 1.57199300  |                                                           |
| H                     | -2.30539700 | 3.27776000  | 1.96517700  |                                                           |
| H                     | -4.03054600 | 2.90048200  | 2.25505000  |                                                           |
| H                     | 4.44384300  | -1.76718300 | 3.69686500  |                                                           |
| H                     | 3.44642700  | -0.37308000 | 3.21089800  |                                                           |
| H                     | 2.95655400  | -2.02838800 | 2.75162800  |                                                           |

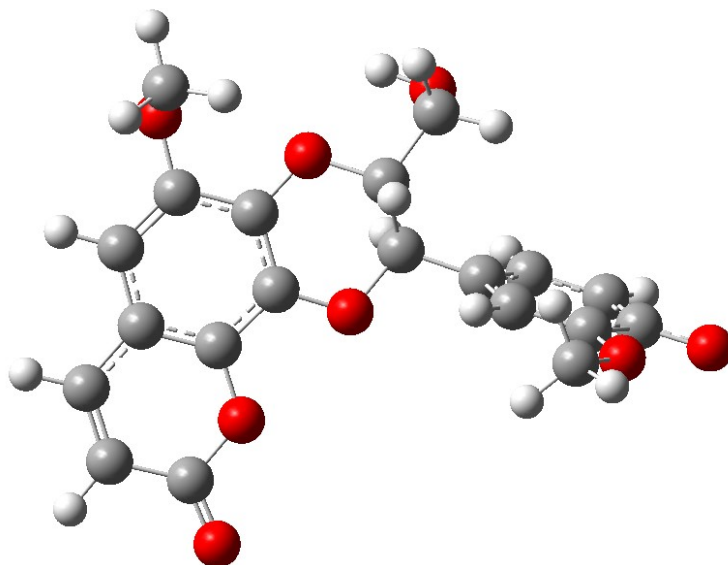

| Name                  |             |             |             | CMC-anion                                    |                             |
|-----------------------|-------------|-------------|-------------|----------------------------------------------|-----------------------------|
| Cartesian Coordinates |             |             |             | Energy                                       |                             |
| O                     | -0.29165800 | 2.20128300  | 0.55365000  | Zero-point correction=                       | 0.377117 (Hartree/Particle) |
| O                     | 1.47446000  | 1.04784900  | -1.32042200 | Thermal correction to Energy=                | 0.404118                    |
| O                     | 2.33517600  | 3.43197400  | -2.54814000 | Thermal correction to Enthalpy=              | 0.405062                    |
| O                     | 3.24977500  | -0.75517200 | -0.52294900 | Thermal correction to Gibbs Free Energy=     | 0.318234                    |
| O                     | -0.22746400 | 1.41662900  | 3.15731500  | Sum of electronic and zero-point Energies=   | -1488.268808                |
| O                     | -1.58098000 | -2.81780300 | -1.61727800 | Sum of electronic and thermal Energies=      | -1488.241807                |
| O                     | -5.03545800 | -0.03064700 | 0.10006800  | Sum of electronic and thermal Enthalpies=    | -1488.240863                |
| O                     | -4.08158900 | -2.52370200 | -0.67914500 | Sum of electronic and thermal Free Energies= | -1488.327692                |
| O                     | 4.87490400  | -2.10456900 | -1.14165700 |                                              |                             |
| C                     | -0.72307500 | 2.03181900  | -0.83136200 |                                              |                             |
| C                     | 0.51865300  | 2.05481800  | -1.71552900 |                                              |                             |
| C                     | -1.61311100 | 0.82276000  | -0.93378700 |                                              |                             |
| C                     | 1.50198300  | 0.72745700  | -0.00155100 |                                              |                             |
| C                     | 0.62510200  | 1.27346700  | 0.92947600  |                                              |                             |
| C                     | 1.20687500  | 3.40984200  | -1.68792200 |                                              |                             |
| C                     | 2.42271300  | -0.22826900 | 0.42966200  |                                              |                             |
| C                     | 0.67182000  | 0.86459600  | 2.27538500  |                                              |                             |
| C                     | -2.91790800 | 0.93420500  | -0.46171500 |                                              |                             |
| C                     | -1.15205400 | -0.44106800 | -1.33689000 |                                              |                             |
| C                     | 2.49101300  | -0.62281400 | 1.76322900  |                                              |                             |
| C                     | 1.59914600  | -0.06308400 | 2.69225700  |                                              |                             |
| C                     | -1.97755800 | -1.55096600 | -1.25325000 |                                              |                             |
| C                     | -3.73877900 | -0.18053100 | -0.38176700 |                                              |                             |
| C                     | -3.32034700 | -1.48087700 | -0.76295100 |                                              |                             |
| C                     | 3.47962900  | -1.61197100 | 2.10274900  |                                              |                             |
| C                     | 4.29146700  | -2.12817400 | 1.15958800  |                                              |                             |
| C                     | 4.19396400  | -1.70118500 | -0.22162900 |                                              |                             |
| C                     | -1.52074200 | 0.79302200  | 3.08059000  |                                              |                             |
| C                     | -0.22683200 | -2.98255300 | -2.01283900 |                                              |                             |
| C                     | -5.11539900 | -0.28686900 | 1.50366300  |                                              |                             |
| H                     | -1.29897100 | 2.93540300  | -1.03200000 |                                              |                             |
| H                     | 0.24723900  | 1.79839000  | -2.74071400 |                                              |                             |
| H                     | 0.51084800  | 4.16682300  | -2.05157500 |                                              |                             |
| H                     | 1.49849700  | 3.66156300  | -0.66259300 |                                              |                             |
| H                     | -3.30390400 | 1.89306800  | -0.12643800 |                                              |                             |
| H                     | -0.14668600 | -0.55233000 | -1.71983900 |                                              |                             |
| H                     | 1.62791300  | -0.37082700 | 3.73088000  |                                              |                             |
| H                     | 3.55496400  | -1.93465500 | 3.13563200  |                                              |                             |
| H                     | 2.97189100  | 2.78526600  | -2.22080400 |                                              |                             |
| H                     | 5.04405400  | -2.87341200 | 1.37673800  |                                              |                             |
| H                     | -2.17619100 | 1.35246400  | 3.74563700  |                                              |                             |
| H                     | -1.45033300 | -0.24636500 | 3.41143000  |                                              |                             |
| H                     | -1.90423000 | 0.83281300  | 2.05830200  |                                              |                             |
| H                     | -0.01006000 | -2.41866600 | -2.92444800 |                                              |                             |
| H                     | -0.09472500 | -4.04555900 | -2.20496900 |                                              |                             |
| H                     | 0.45551200  | -2.66579900 | -1.21725200 |                                              |                             |
| H                     | -6.16351300 | -0.19824400 | 1.78793900  |                                              |                             |
| H                     | -4.52112000 | 0.44635700  | 2.05800800  |                                              |                             |
| H                     | -4.75788100 | -1.29477000 | 1.73208800  |                                              |                             |
| <b>Name</b>           |             |             |             | <b>CMA-O14-TS-G</b>                          |                             |
| Cartesian Coordinates |             |             |             | Energy                                       |                             |
| O                     | -0.47593500 | 1.32416200  | 0.24417900  | Zero-point correction=                       | 0.370795 (Hartree/Particle) |

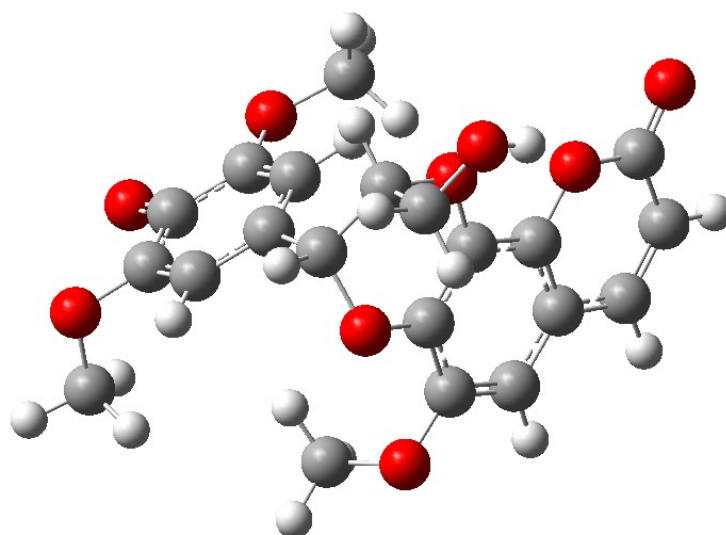

|                       |             |             |             |                                              |                             |
|-----------------------|-------------|-------------|-------------|----------------------------------------------|-----------------------------|
| O                     | -1.48954700 | -1.24618900 | -0.33514700 | Thermal correction to Energy=                | 0.398146                    |
| O                     | 0.65608900  | -2.73193900 | 0.75820100  | Thermal correction to Enthalpy=              | 0.399090                    |
| O                     | -4.11305000 | -1.66621400 | -0.32830800 | Thermal correction to Gibbs Free Energy=     | 0.310922                    |
| O                     | -2.21154500 | 3.39199500  | 0.72706800  | Sum of electronic and zero-point Energies=   | -1525.082217                |
| O                     | 5.08150900  | -0.58506000 | 1.32656900  | Sum of electronic and thermal Energies=      | -1525.054866                |
| O                     | 5.74944700  | 1.29602800  | -0.41427400 | Sum of electronic and thermal Enthalpies=    | -1525.053921                |
| O                     | -5.74071600 | -3.14344000 | -0.57288300 | Sum of electronic and thermal Free Energies= | -1525.142090                |
| C                     | 0.32338900  | 0.15246300  | 0.40802700  |                                              |                             |
| C                     | -0.13474900 | -0.89761700 | -0.61230000 |                                              |                             |
| C                     | 1.76835500  | 0.52043000  | 0.22744800  |                                              |                             |
| C                     | -2.30669800 | -0.18944300 | -0.08533800 |                                              |                             |
| C                     | -1.81239000 | 1.08294700  | 0.18554300  |                                              |                             |
| C                     | 0.64320100  | -2.19926900 | -0.55038200 |                                              |                             |
| C                     | -3.68869200 | -0.40235000 | -0.08139700 |                                              |                             |
| C                     | -2.69696600 | 2.15644800  | 0.42028200  |                                              |                             |
| C                     | -4.56760900 | 0.64862800  | 0.16685600  |                                              |                             |
| C                     | 2.72741100  | -0.21117600 | 0.92264500  |                                              |                             |
| C                     | 2.14657100  | 1.52044800  | -0.67905200 |                                              |                             |
| C                     | -4.05598700 | 1.93307800  | 0.40691800  |                                              |                             |
| C                     | 4.07935400  | 0.04914000  | 0.72029500  |                                              |                             |
| C                     | 3.48459200  | 1.77649600  | -0.90118000 |                                              |                             |
| C                     | -5.97586800 | 0.33463400  | 0.15132500  |                                              |                             |
| C                     | 4.48106600  | 1.05836900  | -0.21283800 |                                              |                             |
| C                     | -6.39702700 | -0.91735700 | -0.09239700 |                                              |                             |
| C                     | -5.45192500 | -2.00467800 | -0.34980200 |                                              |                             |
| C                     | -1.55756400 | 4.06206400  | -0.34693200 |                                              |                             |
| C                     | 4.78440800  | -1.78153300 | 2.02965300  |                                              |                             |
| H                     | 0.15567100  | -0.25125900 | 1.41186100  |                                              |                             |
| H                     | -0.06994700 | -0.46074200 | -1.61787200 |                                              |                             |
| H                     | 0.19699400  | -2.90115900 | -1.26194400 |                                              |                             |
| H                     | 1.68121500  | -2.02436600 | -0.83546000 |                                              |                             |
| H                     | 2.40661000  | -0.99219800 | 1.60171200  |                                              |                             |
| H                     | 1.38303600  | 2.08506400  | -1.19917300 |                                              |                             |
| H                     | -4.72215000 | 2.76401200  | 0.60530600  |                                              |                             |
| H                     | 3.81264300  | 2.53678800  | -1.59954600 |                                              |                             |
| H                     | -6.68698500 | 1.13190600  | 0.34108200  |                                              |                             |
| H                     | -0.24437100 | -2.99108900 | 0.98004100  |                                              |                             |
| H                     | -7.44131200 | -1.19588900 | -0.11305300 |                                              |                             |
| H                     | -1.27190600 | 5.04059700  | 0.03311900  |                                              |                             |
| H                     | -2.24349500 | 4.18028900  | -1.19109700 |                                              |                             |
| H                     | -0.66588100 | 3.51730600  | -0.66192500 |                                              |                             |
| H                     | 4.19081200  | -1.57184700 | 2.92339900  |                                              |                             |
| H                     | 4.24974500  | -2.48008000 | 1.38045400  |                                              |                             |
| H                     | 5.74424400  | -2.20166700 | 2.31733000  |                                              |                             |
| O                     | 5.24416400  | -1.31494500 | -1.41760100 |                                              |                             |
| H                     | 5.02014700  | -1.18388000 | -2.35060800 |                                              |                             |
| O                     | 6.48638200  | -0.76108300 | -1.29225000 |                                              |                             |
| H                     | 6.25331800  | 0.34137100  | -0.69232000 |                                              |                             |
| <b>Name</b>           |             |             |             | <b>CMA-C18-TS-G</b>                          |                             |
| Cartesian Coordinates |             |             |             | Energy                                       |                             |
| O                     | 0.00530600  | 1.15269500  | -0.45784100 | Zero-point correction=                       | 0.370609 (Hartree/Particle) |
| O                     | -1.23747900 | -1.37271900 | -0.50609100 | Thermal correction to Energy=                | 0.398210                    |
| O                     | 0.95226900  | -2.89353300 | 0.44734800  | Thermal correction to Enthalpy=              | 0.399154                    |
| O                     | -3.88413700 | -1.54944100 | -0.21639900 | Thermal correction to Gibbs Free Energy=     | 0.311398                    |

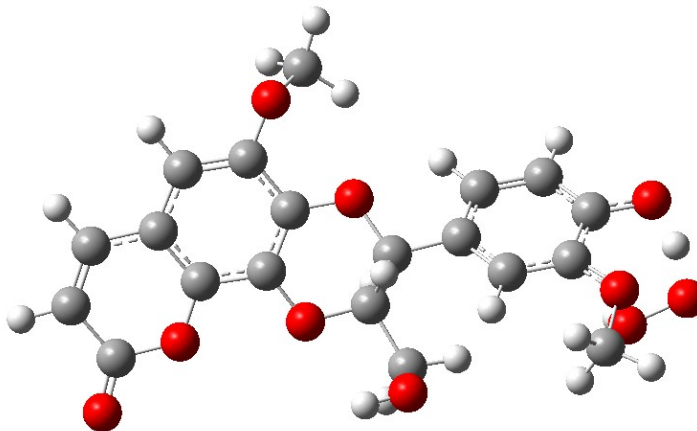



|                       |             |             |             |                                              |                             |
|-----------------------|-------------|-------------|-------------|----------------------------------------------|-----------------------------|
| O                     | -1.48405300 | 3.40769300  | -0.19985500 | Sum of electronic and zero-point Energies=   | -1525.079859                |
| O                     | 5.46253800  | -1.21019200 | 0.43217400  | Sum of electronic and thermal Energies=      | -1525.052258                |
| O                     | 6.24746600  | 0.94479900  | -0.87550600 | Sum of electronic and thermal Enthalpies=    | -1525.051314                |
| O                     | -5.64230300 | -2.88670500 | -0.10618900 | Sum of electronic and thermal Free Energies= | -1525.139070                |
| C                     | 0.73982900  | -0.02089000 | -0.28723000 |                                              |                             |
| C                     | 0.07784100  | -1.17819500 | -1.02984300 |                                              |                             |
| C                     | 2.18636500  | 0.24025800  | -0.47898500 |                                              |                             |
| C                     | -1.95128400 | -0.22758700 | -0.35114700 |                                              |                             |
| C                     | -1.34376700 | 1.02196500  | -0.33580400 |                                              |                             |
| C                     | 0.76556700  | -2.52225100 | -0.90095800 |                                              |                             |
| C                     | -3.33848100 | -0.30830100 | -0.20392400 |                                              |                             |
| C                     | -2.10530300 | 2.19680100  | -0.18590000 |                                              |                             |
| C                     | -4.10399200 | 0.84732600  | -0.06187500 |                                              |                             |
| C                     | 3.11260600  | -0.65773800 | 0.08381500  |                                              |                             |
| C                     | 2.64004300  | 1.37938200  | -1.13899400 |                                              |                             |
| C                     | -3.47314900 | 2.10124800  | -0.05597800 |                                              |                             |
| C                     | 4.46665700  | -0.42089500 | -0.05676400 |                                              |                             |
| C                     | 4.00670100  | 1.61179500  | -1.27620600 |                                              |                             |
| C                     | -5.52947100 | 0.66743700  | 0.07210200  |                                              |                             |
| C                     | 4.92224300  | 0.72017600  | -0.74508800 |                                              |                             |
| C                     | -6.07010900 | -0.56202900 | 0.06173900  |                                              |                             |
| C                     | -5.24226800 | -1.75985300 | -0.08708200 |                                              |                             |
| C                     | -0.76712200 | 3.70123200  | 1.00417200  |                                              |                             |
| C                     | 5.07882900  | -2.38605100 | 1.12668000  |                                              |                             |
| H                     | -0.00153900 | -0.90072800 | -2.09153000 |                                              |                             |
| H                     | 0.16100500  | -3.26076200 | -1.43734900 |                                              |                             |
| H                     | 1.75179200  | -2.47814400 | -1.36417200 |                                              |                             |
| H                     | 2.74593500  | -1.51518500 | 0.63653800  |                                              |                             |
| H                     | 1.92483000  | 2.08271000  | -1.54527800 |                                              |                             |
| H                     | -4.05331900 | 3.00977200  | 0.05217300  |                                              |                             |
| H                     | 4.37973800  | 2.48634700  | -1.79444000 |                                              |                             |
| H                     | -6.15471500 | 1.54739200  | 0.18190300  |                                              |                             |
| H                     | 0.08921400  | -2.93056100 | 0.87451700  |                                              |                             |
| H                     | -7.13161300 | -0.74132900 | 0.15987700  |                                              |                             |
| H                     | -0.27967300 | 4.66006300  | 0.83981900  |                                              |                             |
| H                     | -0.02220900 | 2.93243900  | 1.21689400  |                                              |                             |
| H                     | -1.46642800 | 3.78118900  | 1.84145000  |                                              |                             |
| H                     | 6.72050900  | 0.22187000  | -0.44478600 |                                              |                             |
| H                     | 4.50162500  | -2.13703400 | 2.02120000  |                                              |                             |
| H                     | 4.48549000  | -3.04078000 | 0.48244700  |                                              |                             |
| H                     | 6.00198800  | -2.88447700 | 1.41100800  |                                              |                             |
| O                     | 1.24681500  | 1.07412000  | 2.37269100  |                                              |                             |
| H                     | 2.20376900  | 0.94185500  | 2.29259300  |                                              |                             |
| O                     | 0.71729200  | -0.18492900 | 2.20700700  |                                              |                             |
| H                     | 0.64347400  | -0.29191900 | 0.97206000  |                                              |                             |
| <b>Name</b>           |             |             |             | <b>CMB-O14-TS-G</b>                          |                             |
| Cartesian Coordinates |             |             |             | Energy                                       |                             |
| O                     | 0.47141700  | 0.17582600  | -0.16761300 | Zero-point correction=                       | 0.370593 (Hartree/Particle) |
| O                     | 1.87166700  | -2.20676900 | 0.38997500  | Thermal correction to Energy=                | 0.397984                    |
| O                     | 1.78584500  | 2.47738700  | -0.32276200 | Thermal correction to Enthalpy=              | 0.398928                    |
| O                     | 0.03592900  | -4.00911500 | -0.78227500 | Thermal correction to Gibbs Free Energy=     | 0.310728                    |
| O                     | 4.59619500  | -2.15882000 | 0.63511500  | Sum of electronic and zero-point Energies=   | -1525.081380                |
| O                     | -4.15360800 | 1.07594600  | 1.44074800  | Sum of electronic and thermal Energies=      | -1525.053989                |
| O                     | -5.69472600 | -0.65304400 | 0.15318800  | Sum of electronic and thermal Enthalpies=    | -1525.053045                |

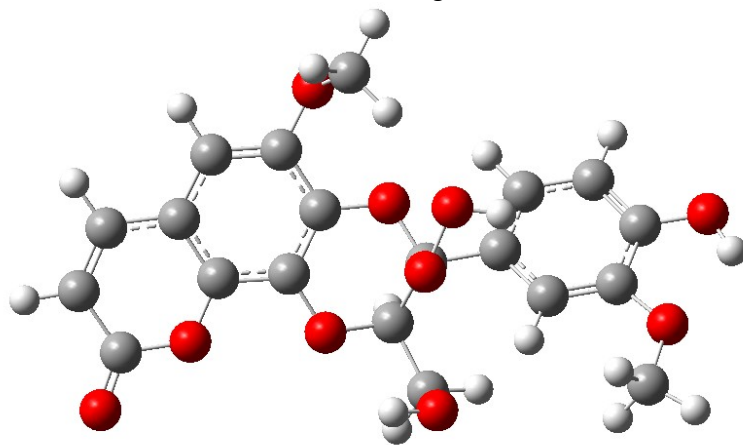



|                       |             |             |             |                                              |                             |
|-----------------------|-------------|-------------|-------------|----------------------------------------------|-----------------------------|
| O                     | 1.63587900  | 4.66699800  | -0.59557900 | Sum of electronic and thermal Free Energies= | -1525.141245                |
| C                     | -0.12655700 | -1.10064100 | -0.38107700 |                                              |                             |
| C                     | 0.46561200  | -2.08917600 | 0.63234400  |                                              |                             |
| C                     | -1.61812400 | -0.95274800 | -0.24787900 |                                              |                             |
| C                     | 1.81912000  | 0.15147700  | -0.02070700 |                                              |                             |
| C                     | 2.52078000  | -1.02172800 | 0.23540000  |                                              |                             |
| C                     | -0.08365200 | -3.49886200 | 0.53013700  |                                              |                             |
| C                     | 2.52055000  | 1.35929900  | -0.10541800 |                                              |                             |
| C                     | 3.92493600  | -1.00402400 | 0.35691400  |                                              |                             |
| C                     | 3.90596200  | 1.38799800  | 0.03284400  |                                              |                             |
| C                     | -2.15072200 | 0.05756000  | 0.54402900  |                                              |                             |
| C                     | -2.45635800 | -1.86665700 | -0.90839600 |                                              |                             |
| C                     | 4.60286800  | 0.18990100  | 0.25324900  |                                              |                             |
| C                     | -3.53290500 | 0.15839700  | 0.69949600  |                                              |                             |
| C                     | -3.82439000 | -1.76229000 | -0.77997300 |                                              |                             |
| C                     | 4.54217000  | 2.67931200  | -0.06947200 |                                              |                             |
| C                     | -4.39921700 | -0.75939500 | 0.02653300  |                                              |                             |
| C                     | 3.81426600  | 3.78762200  | -0.28310700 |                                              |                             |
| C                     | 2.35777700  | 3.73082900  | -0.41633000 |                                              |                             |
| C                     | 4.68037000  | -3.06189800 | -0.46175700 |                                              |                             |
| C                     | -3.41622900 | 2.22100100  | 1.84142900  |                                              |                             |
| H                     | 0.12810800  | -1.45118800 | -1.38741500 |                                              |                             |
| H                     | 0.30833400  | -1.69050200 | 1.64294200  |                                              |                             |
| H                     | 0.44634100  | -4.12829600 | 1.25227500  |                                              |                             |
| H                     | -1.14435900 | -3.50163800 | 0.78033300  |                                              |                             |
| H                     | -1.48547900 | 0.76900000  | 1.01375200  |                                              |                             |
| H                     | -2.01593600 | -2.64811200 | -1.51882700 |                                              |                             |
| H                     | 5.68041700  | 0.19090200  | 0.36553900  |                                              |                             |
| H                     | -4.49917400 | -2.44043800 | -1.28788600 |                                              |                             |
| H                     | 5.62115300  | 2.73516800  | 0.03057800  |                                              |                             |
| H                     | 0.97303600  | -4.09138400 | -0.98333400 |                                              |                             |
| H                     | 4.24949900  | 4.77375200  | -0.36495300 |                                              |                             |
| H                     | 5.22806500  | -3.93155400 | -0.10468100 |                                              |                             |
| H                     | 5.22130800  | -2.59974500 | -1.29284500 |                                              |                             |
| H                     | 3.68493200  | -3.36620800 | -0.79394300 |                                              |                             |
| H                     | -4.14003900 | 2.89667700  | 2.28899000  |                                              |                             |
| H                     | -2.65428200 | 1.95752400  | 2.57984300  |                                              |                             |
| H                     | -2.95216100 | 2.69372400  | 0.97245600  |                                              |                             |
| O                     | -4.82757100 | 1.70307900  | -1.19501500 |                                              |                             |
| H                     | -4.83986900 | 1.49718100  | -2.14123800 |                                              |                             |
| O                     | -6.10679000 | 1.46749400  | -0.78062300 |                                              |                             |
| H                     | -6.00132900 | 0.38742800  | -0.12241800 |                                              |                             |
| <b>Name</b>           |             |             |             | <b>CMB-C17-TS-G</b>                          |                             |
| Cartesian Coordinates |             |             |             | Energy                                       |                             |
| O                     | -0.01503800 | 0.28975400  | -0.07310800 | Zero-point correction=                       | 0.370307 (Hartree/Particle) |
| O                     | -1.19003100 | -2.23209400 | -0.48383400 | Thermal correction to Energy=                | 0.397980                    |
| O                     | -1.54097700 | 2.44586500  | 0.14288200  | Thermal correction to Enthalpy=              | 0.398924                    |
| O                     | 0.87212600  | -3.72712700 | 0.78746800  | Thermal correction to Gibbs Free Energy=     | 0.310591                    |
| O                     | -3.91414400 | -2.48027300 | -0.49627900 | Sum of electronic and zero-point Energies=   | -1525.078522                |
| O                     | 4.51911600  | 2.10062100  | -0.96381300 | Sum of electronic and thermal Energies=      | -1525.050849                |
| O                     | 6.21915300  | 0.33896000  | 0.01319300  | Sum of electronic and thermal Enthalpies=    | -1525.049905                |
| O                     | -1.59474200 | 4.63819000  | 0.42108600  | Sum of electronic and thermal Free Energies= | -1525.138238                |
| C                     | 0.72748000  | -0.87745800 | 0.10961500  |                                              |                             |
| C                     | 0.19441000  | -2.00445600 | -0.77592700 |                                              |                             |

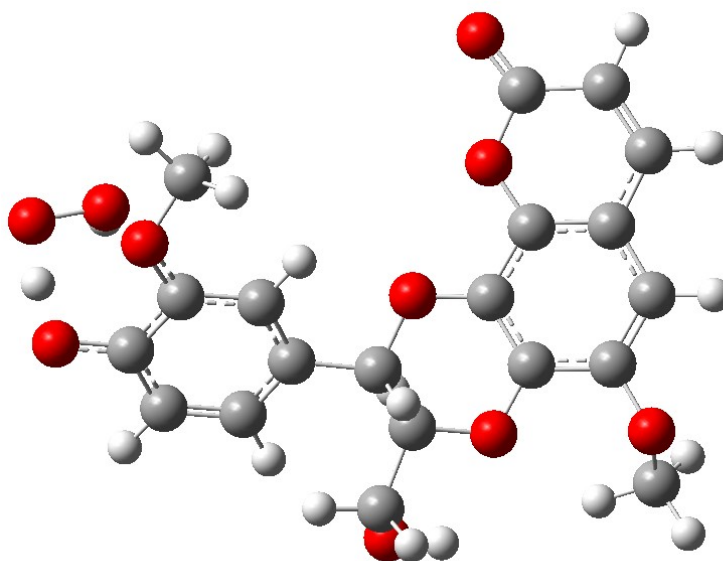

|   |             |             |             |
|---|-------------|-------------|-------------|
| C | 2.17957600  | -0.56832500 | 0.07119100  |
| C | -1.36266700 | 0.12918900  | -0.16382100 |
| C | -1.94672700 | -1.11545900 | -0.34739900 |
| C | 0.86004300  | -3.35076800 | -0.56948600 |
| C | -2.17179200 | 1.25835200  | -0.02871000 |
| C | -3.34968500 | -1.24495700 | -0.37116700 |
| C | -3.55869400 | 1.14081600  | -0.05105600 |
| C | 2.61433700  | 0.65654600  | -0.45967600 |
| C | 3.10981900  | -1.46139600 | 0.60391700  |
| C | -4.13882600 | -0.12626900 | -0.22149000 |
| C | 3.96479200  | 0.95349000  | -0.47889400 |
| C | 4.46650500  | -1.15744600 | 0.57775300  |
| C | -4.31386600 | 2.35757900  | 0.11844800  |
| C | 4.90159000  | 0.04054300  | 0.03547400  |
| C | -3.68976900 | 3.53646300  | 0.28262700  |
| C | -2.23043100 | 3.63202000  | 0.29396400  |
| C | -3.83218100 | -3.02968300 | -1.80806400 |
| C | 3.63759900  | 3.10559400  | -1.43517800 |
| H | 0.28430000  | -1.69026500 | -1.82628900 |
| H | 0.32580300  | -4.08364000 | -1.18470200 |
| H | 1.89661500  | -3.30864400 | -0.90441900 |
| H | 1.88412100  | 1.35862300  | -0.83721300 |
| H | 2.76827600  | -2.37989500 | 1.06764500  |
| H | -5.21600400 | -0.24256200 | -0.23004900 |
| H | 5.20289100  | -1.83477500 | 0.99167500  |
| H | -5.39745600 | 2.30086900  | 0.11329300  |
| H | -0.02178900 | -3.64730600 | 1.14246700  |
| H | -4.21733900 | 4.47088800  | 0.41286100  |
| H | -4.32079000 | -4.00095300 | -1.76518300 |
| H | -2.79144100 | -3.15558400 | -2.11407400 |
| H | -4.35515400 | -2.38502200 | -2.52091200 |
| H | 6.32171800  | 1.21624200  | -0.37631600 |
| H | 4.26474700  | 3.93918100  | -1.74104600 |
| H | 3.06251300  | 2.74483200  | -2.29231500 |
| H | 2.95533800  | 3.42681000  | -0.64373600 |
| O | -0.71345500 | -0.28153900 | 2.71992700  |
| H | -0.04749200 | 0.23861400  | 3.19068800  |
| O | -0.06790400 | -1.46121300 | 2.42258900  |
| H | 0.43921900  | -1.26281300 | 1.30400800  |

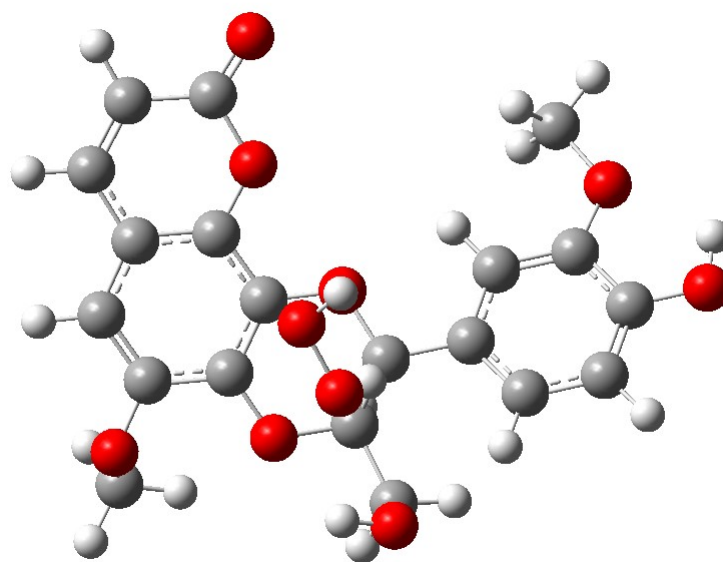

| Name                  |             |             |             | CMC-O14-TS-G                                 |                             |
|-----------------------|-------------|-------------|-------------|----------------------------------------------|-----------------------------|
| Cartesian Coordinates |             |             |             | Energy                                       |                             |
| O                     | -0.28946400 | -2.43923200 | 0.54786700  | Zero-point correction=                       | 0.403434 (Hartree/Particle) |
| O                     | -1.73576300 | -0.96806600 | -1.37375400 | Thermal correction to Energy=                | 0.433551                    |
| O                     | -3.01577600 | -3.12927700 | -2.61364900 | Thermal correction to Enthalpy=              | 0.434495                    |
| O                     | -3.24767900 | 1.07073300  | -0.62603700 | Thermal correction to Gibbs Free Energy=     | 0.339554                    |
| O                     | -0.45983700 | -1.70279500 | 3.23137200  | Sum of electronic and zero-point Energies=   | -1639.554968                |
| O                     | 1.95168000  | 2.16423600  | -1.91419100 | Sum of electronic and thermal Energies=      | -1639.524852                |
| O                     | 4.53763100  | -0.89252900 | 0.64601800  | Sum of electronic and thermal Enthalpies=    | -1639.523907                |
| O                     | 4.11366100  | 1.68046200  | -0.50559400 | Sum of electronic and thermal Free Energies= | -1639.618848                |
| O                     | -4.61295800 | 2.68423800  | -1.27568500 |                                              |                             |
| C                     | 0.19444000  | -2.33995900 | -0.80341800 |                                              |                             |
| C                     | -0.99884300 | -2.14563000 | -1.72948200 |                                              |                             |
| C                     | 1.26939400  | -1.27135100 | -0.86685100 |                                              |                             |
| C                     | -1.78290200 | -0.66951100 | -0.04743100 |                                              |                             |

|   |             |             |             |
|---|-------------|-------------|-------------|
| C | -1.05974000 | -1.37531500 | 0.91093700  |
| C | -1.95561700 | -3.33039400 | -1.71167800 |
| C | -2.58133400 | 0.40458100  | 0.35197900  |
| C | -1.13060900 | -1.01456700 | 2.27077400  |
| C | 2.46027600  | -1.53889200 | -0.19148900 |
| C | 1.06337200  | -0.04154800 | -1.49057800 |
| C | -2.67816000 | 0.75208100  | 1.69702500  |
| C | -1.94646700 | 0.03225300  | 2.65092300  |
| C | 2.04798500  | 0.93600000  | -1.40100900 |
| C | 3.44930300  | -0.57231100 | -0.07982000 |
| C | 3.25066800  | 0.70626800  | -0.66568500 |
| C | -3.53912600 | 1.86540300  | 2.01902600  |
| C | -4.19902800 | 2.52405000  | 1.05252600  |
| C | -4.07120000 | 2.14533200  | -0.35566500 |
| C | 0.94256100  | -1.89596700 | 3.04383200  |
| C | 0.67438400  | 2.60257200  | -2.35456300 |
| C | 5.80923200  | -0.31463400 | 0.33492700  |
| H | 0.63789300  | -3.31694600 | -1.00428700 |
| H | -0.66130300 | -1.97096600 | -2.75348400 |
| H | -1.42807900 | -4.23049900 | -2.03429100 |
| H | -2.31912600 | -3.49196900 | -0.68904800 |
| H | 2.62681100  | -2.49808600 | 0.28526600  |
| H | 0.13798200  | 0.16822800  | -2.00659000 |
| H | -2.00431200 | 0.29028800  | 3.70129300  |
| H | -3.64114500 | 2.15809300  | 3.05884900  |
| H | -3.44042800 | -2.29359600 | -2.39248800 |
| H | -4.85256100 | 3.36235200  | 1.24932900  |
| H | 1.38299100  | -1.91699400 | 4.03949300  |
| H | 1.37412500  | -1.07416100 | 2.46475500  |
| H | 1.13797800  | -2.83561300 | 2.52835300  |
| H | 0.35741800  | 2.05481500  | -3.24569700 |
| H | 0.78989000  | 3.65586700  | -2.59490200 |
| H | -0.06306100 | 2.47986700  | -1.55688700 |
| H | 5.93149800  | 0.64807900  | 0.82601300  |
| H | 5.91914300  | -0.18572700 | -0.74289600 |
| H | 6.54535200  | -1.02724200 | 0.70231200  |
| O | 1.75326000  | 2.41842400  | 0.91363000  |
| H | 1.81785000  | 2.04021600  | 1.80352500  |
| O | 2.86072000  | 3.20119500  | 0.79344500  |
| H | 3.59576400  | 2.53410700  | -0.03168000 |

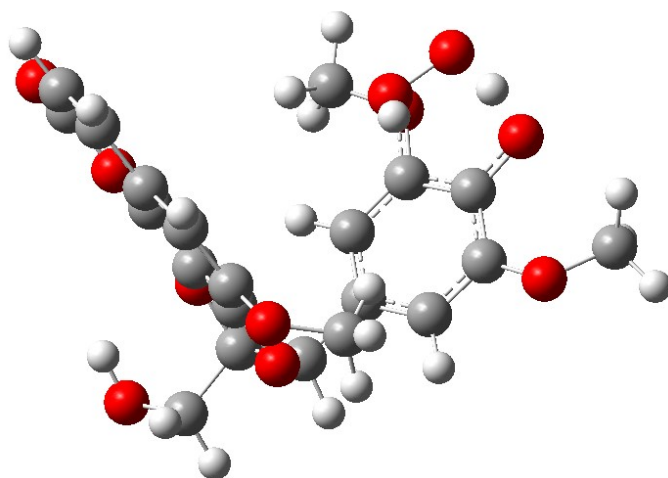

| Name                  |             |             |             | CMC-C18-TS-G                                 |                             |
|-----------------------|-------------|-------------|-------------|----------------------------------------------|-----------------------------|
| Cartesian Coordinates |             |             |             | Energy                                       |                             |
| O                     | 0.20490400  | -0.02529900 | -1.68920300 | Zero-point correction=                       | 0.402505 (Hartree/Particle) |
| O                     | 1.15190500  | -1.33908500 | 0.61260000  | Thermal correction to Energy=                | 0.433193                    |
| O                     | 1.71495200  | -3.86440600 | -0.49043900 | Thermal correction to Enthalpy=              | 0.434137                    |
| O                     | 3.51131900  | -0.65851100 | 1.65403200  | Thermal correction to Gibbs Free Energy=     | 0.337807                    |
| O                     | 1.76613700  | 1.90270700  | -2.90066800 | Sum of electronic and zero-point Energies=   | -1639.544732                |
| O                     | -4.76624000 | -1.11209700 | 1.63933300  | Sum of electronic and thermal Energies=      | -1639.514044                |
| O                     | -2.88707500 | 3.07852800  | 0.58795700  | Sum of electronic and thermal Enthalpies=    | -1639.513099                |
| O                     | -4.85887300 | 1.50958100  | 1.76668800  | Sum of electronic and thermal Free Energies= | -1639.609429                |
| O                     | 5.00610200  | -1.03539000 | 3.24021500  |                                              |                             |
| C                     | -0.59872300 | -0.92811500 | -0.98308600 |                                              |                             |
| C                     | 0.22282200  | -1.98518300 | -0.27119600 |                                              |                             |
| C                     | -1.68731100 | -0.27147500 | -0.22535200 |                                              |                             |

|   |             |             |             |
|---|-------------|-------------|-------------|
| C | 1.86138900  | -0.34324400 | 0.01684300  |
| C | 1.39921700  | 0.30851100  | -1.12245300 |
| C | 0.98154200  | -2.90832700 | -1.21673800 |
| C | 3.09757800  | 0.02140100  | 0.55521200  |
| C | 2.16585600  | 1.31647700  | -1.74064300 |
| C | -1.77289500 | 1.11370000  | -0.13540300 |
| C | -2.68491600 | -1.07219800 | 0.36189600  |
| C | 3.85944300  | 1.02576900  | -0.03763600 |
| C | 3.38090500  | 1.66635100  | -1.18923800 |
| C | -3.73136600 | -0.46788500 | 1.03431400  |
| C | -2.82274900 | 1.71984600  | 0.55035700  |
| C | -3.81531600 | 0.93354200  | 1.13150700  |
| C | 5.12398700  | 1.33469900  | 0.58581300  |
| C | 5.52878500  | 0.67052700  | 1.68067800  |
| C | 4.71518800  | -0.39054200 | 2.27649100  |
| C | 0.53233700  | 2.62133100  | -2.86775000 |
| C | -4.76774600 | -2.52938500 | 1.61184400  |
| C | -2.78445500 | 3.65597800  | 1.88977800  |
| H | -0.40918900 | -2.58266900 | 0.38469500  |
| H | 0.26545500  | -3.44980400 | -1.83821600 |
| H | 1.62944600  | -2.32147300 | -1.88060200 |
| H | -1.02640900 | 1.75092200  | -0.59025800 |
| H | -2.63801900 | -2.15007600 | 0.26874100  |
| H | 3.96489300  | 2.43987500  | -1.67297300 |
| H | 5.74049400  | 2.11385600  | 0.14978100  |
| H | 2.26889600  | -3.40071000 | 0.14718600  |
| H | 6.46753300  | 0.86912100  | 2.17855400  |
| H | 0.52563000  | 3.24399700  | -3.75997700 |
| H | 0.49055500  | 3.26057400  | -1.98024500 |
| H | -0.32043400 | 1.94251400  | -2.88580800 |
| H | -5.43591900 | 0.80715100  | 2.09295300  |
| H | -4.81585400 | -2.89713100 | 0.58309600  |
| H | -5.65707600 | -2.84154400 | 2.15307900  |
| H | -3.87688100 | -2.92539700 | 2.10643800  |
| H | -2.79221200 | 4.73368600  | 1.74194900  |
| H | -1.84290400 | 3.35615400  | 2.35880800  |
| H | -3.62621200 | 3.36229900  | 2.51739400  |
| O | -2.89917700 | -0.91732900 | -2.92331400 |
| H | -3.55092300 | -0.92070000 | -2.20526300 |
| O | -2.10957300 | -2.01033400 | -2.67134500 |
| H | -1.25736500 | -1.56821800 | -1.90761500 |

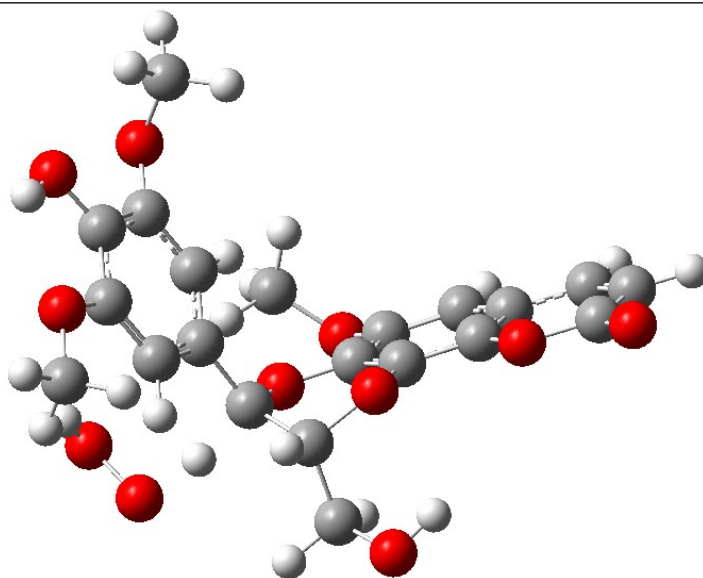

| Name                  |             |             |             | CMA-O14-TS-P                                 |                             |
|-----------------------|-------------|-------------|-------------|----------------------------------------------|-----------------------------|
| Cartesian Coordinates |             |             |             | Energy                                       |                             |
| O                     | -0.48137300 | 1.30373300  | -0.04022700 | Zero-point correction=                       | 0.370117 (Hartree/Particle) |
| O                     | -1.53278800 | -1.31329600 | -0.18761900 | Thermal correction to Energy=                | 0.397510                    |
| O                     | 0.63787500  | -2.64209800 | 1.08797100  | Thermal correction to Enthalpy=              | 0.398455                    |
| O                     | -4.17315700 | -1.67477600 | -0.18614500 | Thermal correction to Gibbs Free Energy=     | 0.309994                    |
| O                     | -2.15566200 | 3.44383800  | -0.02531100 | Sum of electronic and zero-point Energies=   | -1525.120104                |
| O                     | 5.09168300  | -0.32852800 | 1.30571900  | Sum of electronic and thermal Energies=      | -1525.092710                |
| O                     | 5.71318300  | 1.23759500  | -0.77360100 | Sum of electronic and thermal Enthalpies=    | -1525.091766                |
| O                     | -5.81970000 | -3.14097000 | -0.24913300 | Sum of electronic and thermal Free Energies= | -1525.180227                |
| C                     | 0.31118100  | 0.15840500  | 0.28979200  |                                              |                             |
| C                     | -0.17474400 | -1.03456800 | -0.54216300 |                                              |                             |
| C                     | 1.75208000  | 0.48574600  | 0.01866300  |                                              |                             |

|   |             |             |             |
|---|-------------|-------------|-------------|
| C | -2.33225000 | -0.21844200 | -0.12670300 |
| C | -1.81762700 | 1.07295700  | -0.06090900 |
| C | 0.59426100  | -2.31621000 | -0.28923600 |
| C | -3.71895500 | -0.39565400 | -0.13478400 |
| C | -2.68310600 | 2.18664500  | -0.03419000 |
| C | -4.58080400 | 0.69774100  | -0.10283500 |
| C | 2.72667600  | -0.05083800 | 0.85709800  |
| C | 2.11001800  | 1.25019900  | -1.10088300 |
| C | -4.04651500 | 1.99537000  | -0.05635200 |
| C | 4.07194600  | 0.16859800  | 0.58203900  |
| C | 3.44132600  | 1.47405500  | -1.38104100 |
| C | -5.99396900 | 0.41477200  | -0.12926400 |
| C | 4.45331700  | 0.95846100  | -0.54799100 |
| C | -6.43956300 | -0.85329700 | -0.17864400 |
| C | -5.51398100 | -1.97896400 | -0.20788600 |
| C | -1.64674000 | 3.84653200  | 1.24875900  |
| C | 4.77677200  | -1.05718100 | 2.49335500  |
| H | 0.16678100  | -0.07554900 | 1.34944000  |
| H | -0.12569000 | -0.77138900 | -1.60637200 |
| H | 0.13121800  | -3.11806500 | -0.87283000 |
| H | 1.62409200  | -2.19822100 | -0.62837000 |
| H | 2.42253700  | -0.64749100 | 1.70827800  |
| H | 1.33786200  | 1.66682200  | -1.73605200 |
| H | -4.70405800 | 2.85687500  | -0.03982800 |
| H | 3.74901900  | 2.06502600  | -2.23559600 |
| H | -6.69021400 | 1.24693400  | -0.10981200 |
| H | -0.25658400 | -2.86933800 | 1.36637600  |
| H | -7.49098900 | -1.10550400 | -0.20062100 |
| H | -1.25098900 | 4.85263000  | 1.12021400  |
| H | -0.84733800 | 3.17990200  | 1.57973000  |
| H | -2.45222900 | 3.86010500  | 1.98910300  |
| H | 4.22060400  | -0.42819200 | 3.19184000  |
| H | 4.20050800  | -1.95632400 | 2.25864000  |
| H | 5.73280900  | -1.33590100 | 2.92988800  |
| O | 5.59840300  | -1.61974800 | -1.20103100 |
| H | 5.50212700  | -1.78842300 | -0.24788600 |
| O | 6.70775200  | -0.83602100 | -1.28850600 |
| H | 6.30485700  | 0.30232100  | -0.93403600 |

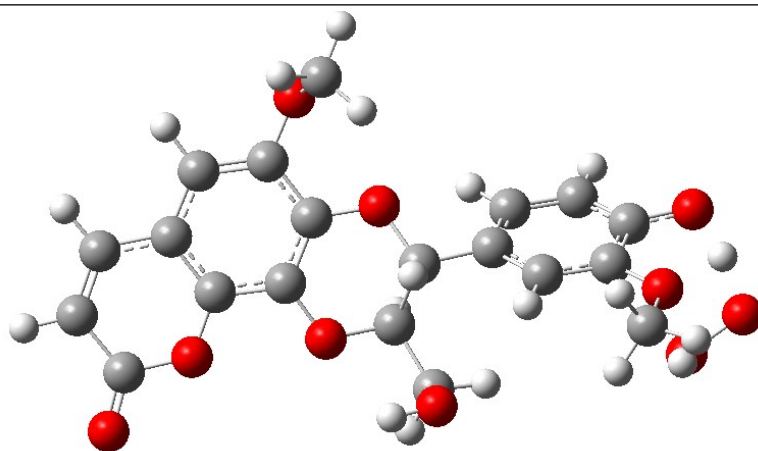

| Name                  |             |             |             | CMA-C18-TS-P                                 |                             |
|-----------------------|-------------|-------------|-------------|----------------------------------------------|-----------------------------|
| Cartesian Coordinates |             |             |             | Energy                                       |                             |
| O                     | 0.00264300  | 1.14736200  | -0.42600000 | Zero-point correction=                       | 0.369658 (Hartree/Particle) |
| O                     | -1.24297500 | -1.37485500 | -0.49083900 | Thermal correction to Energy=                | 0.397448                    |
| O                     | 0.95020800  | -2.92343800 | 0.43506600  | Thermal correction to Enthalpy=              | 0.398392                    |
| O                     | -3.89842800 | -1.54339400 | -0.22066600 | Thermal correction to Gibbs Free Energy=     | 0.310043                    |
| O                     | -1.48220500 | 3.40401900  | -0.19813700 | Sum of electronic and zero-point Energies=   | -1525.113867                |
| O                     | 5.47883100  | -1.18488600 | 0.40536600  | Sum of electronic and thermal Energies=      | -1525.086077                |
| O                     | 6.23659700  | 0.96851600  | -0.91210700 | Sum of electronic and thermal Enthalpies=    | -1525.085133                |
| O                     | -5.65185300 | -2.87765000 | -0.12460900 | Sum of electronic and thermal Free Energies= | -1525.173481                |
| C                     | 0.74019600  | -0.02808700 | -0.26761000 |                                              |                             |
| C                     | 0.07650900  | -1.18065500 | -1.01731300 |                                              |                             |
| C                     | 2.18445900  | 0.23983700  | -0.47388500 |                                              |                             |
| C                     | -1.95540400 | -0.23096200 | -0.33999700 |                                              |                             |
| C                     | -1.34606600 | 1.01817000  | -0.31846100 |                                              |                             |
| C                     | 0.76326500  | -2.52520400 | -0.90821800 |                                              |                             |

|   |             |             |             |
|---|-------------|-------------|-------------|
| C | -3.34395800 | -0.30377300 | -0.20279200 |
| C | -2.10786800 | 2.19496300  | -0.17879500 |
| C | -4.10928500 | 0.85214700  | -0.06464400 |
| C | 3.12172900  | -0.65350600 | 0.07782100  |
| C | 2.62417300  | 1.37992800  | -1.14252400 |
| C | -3.47664700 | 2.10549000  | -0.05550100 |
| C | 4.47394500  | -0.40831900 | -0.07406300 |
| C | 3.98813500  | 1.62017900  | -1.29543700 |
| C | -5.53532900 | 0.67787500  | 0.05870600  |
| C | 4.91328600  | 0.73574500  | -0.76941000 |
| C | -6.08003500 | -0.55145500 | 0.04307500  |
| C | -5.25311700 | -1.74389900 | -0.10082600 |
| C | -0.78411300 | 3.70961700  | 1.01604200  |
| C | 5.11605200  | -2.36058700 | 1.12015100  |
| H | -0.00376900 | -0.89451300 | -2.07582500 |
| H | 0.16145200  | -3.25535500 | -1.45887100 |
| H | 1.74745700  | -2.47423600 | -1.37476600 |
| H | 2.77015200  | -1.51792100 | 0.62909400  |
| H | 1.90539500  | 2.07956000  | -1.54923900 |
| H | -4.06051000 | 3.01242200  | 0.05003700  |
| H | 4.34516700  | 2.49728300  | -1.82213700 |
| H | -6.15800300 | 1.56014800  | 0.16467000  |
| H | 0.08355500  | -3.01236200 | 0.84864300  |
| H | -7.14409200 | -0.72288300 | 0.13358300  |
| H | -0.30493800 | 4.67476400  | 0.85967100  |
| H | -0.02881000 | 2.95243800  | 1.23605600  |
| H | -1.49306600 | 3.78087900  | 1.84615800  |
| H | 6.72076700  | 0.25021300  | -0.48255100 |
| H | 4.54681200  | -2.10736200 | 2.01864900  |
| H | 4.53027000  | -3.03275600 | 0.48730400  |
| H | 6.04941100  | -2.84271300 | 1.40182100  |
| O | 1.30687200  | 1.00914200  | 2.43481300  |
| H | 2.25922400  | 0.83548600  | 2.35608900  |
| O | 0.72030700  | -0.22020000 | 2.23528500  |
| H | 0.65398900  | -0.30504400 | 0.98833000  |

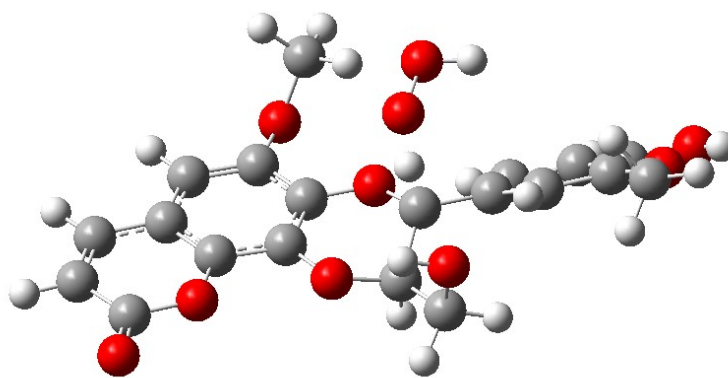

| Name                  |             |             |             | CMB-O14-TS-P                                 |                             |
|-----------------------|-------------|-------------|-------------|----------------------------------------------|-----------------------------|
| Cartesian Coordinates |             |             |             | Energy                                       |                             |
| O                     | 0.48448800  | 0.20199300  | -0.22717000 | Zero-point correction=                       | 0.370143 (Hartree/Particle) |
| O                     | 1.84815000  | -2.24294500 | 0.10423400  | Thermal correction to Energy=                | 0.397478                    |
| O                     | 1.86703500  | 2.47908800  | -0.33024900 | Thermal correction to Enthalpy=              | 0.398422                    |
| O                     | -0.01388700 | -3.91086800 | -1.22571200 | Thermal correction to Gibbs Free Energy=     | 0.310244                    |
| O                     | 4.56416100  | -2.29561400 | 0.14659700  | Sum of electronic and zero-point Energies=   | -1525.119507                |
| O                     | -4.10546900 | 1.00457000  | 1.54288800  | Sum of electronic and thermal Energies=      | -1525.092172                |
| O                     | -5.69059700 | -0.64617700 | 0.16337600  | Sum of electronic and thermal Enthalpies=    | -1525.091228                |
| O                     | 1.76695000  | 4.67591700  | -0.49866200 | Sum of electronic and thermal Free Energies= | -1525.179406                |
| C                     | -0.13780800 | -1.04276600 | -0.55435300 |                                              |                             |
| C                     | 0.44182200  | -2.13008800 | 0.36005700  |                                              |                             |
| C                     | -1.62423200 | -0.88224400 | -0.39050400 |                                              |                             |
| C                     | 1.83700700  | 0.13841600  | -0.14129900 |                                              |                             |
| C                     | 2.51508000  | -1.06660200 | 0.01090000  |                                              |                             |
| C                     | -0.12497900 | -3.51659800 | 0.12765300  |                                              |                             |
| C                     | 2.57300700  | 1.32526400  | -0.20802500 |                                              |                             |
| C                     | 3.92417200  | -1.09469200 | 0.05428100  |                                              |                             |
| C                     | 3.96478400  | 1.30813900  | -0.15789800 |                                              |                             |



|                       |             |             |             |                                              |                             |  |  |
|-----------------------|-------------|-------------|-------------|----------------------------------------------|-----------------------------|--|--|
| C                     | -2.13129300 | 0.02333800  | 0.53663800  |                                              |                             |  |  |
| C                     | -2.48643600 | -1.67793500 | -1.16131900 |                                              |                             |  |  |
| C                     | 4.63546700  | 0.08103100  | -0.03120400 |                                              |                             |  |  |
| C                     | -3.50848100 | 0.13729200  | 0.70626200  |                                              |                             |  |  |
| C                     | -3.85019400 | -1.57420700 | -0.99773200 |                                              |                             |  |  |
| C                     | 4.63628600  | 2.58043300  | -0.24966200 |                                              |                             |  |  |
| C                     | -4.39814900 | -0.68674700 | -0.05028200 |                                              |                             |  |  |
| C                     | 3.93336600  | 3.72086700  | -0.36813100 |                                              |                             |  |  |
| C                     | 2.47624200  | 3.70964600  | -0.40680200 |                                              |                             |  |  |
| C                     | 4.57255500  | -2.84002800 | 1.46827900  |                                              |                             |  |  |
| C                     | -3.27532800 | 1.82153400  | 2.36945300  |                                              |                             |  |  |
| H                     | 0.09964200  | -1.29639800 | -1.59306700 |                                              |                             |  |  |
| H                     | 0.28993800  | -1.83076000 | 1.40480000  |                                              |                             |  |  |
| H                     | 0.39601200  | -4.21612000 | 0.78974800  |                                              |                             |  |  |
| H                     | -1.18433800 | -3.53032500 | 0.38488300  |                                              |                             |  |  |
| H                     | -1.45032500 | 0.64516200  | 1.10119400  |                                              |                             |  |  |
| H                     | -2.06930600 | -2.37347400 | -1.88150000 |                                              |                             |  |  |
| H                     | 5.71856600  | 0.05099600  | -0.00072500 |                                              |                             |  |  |
| H                     | -4.53850500 | -2.17672800 | -1.57849100 |                                              |                             |  |  |
| H                     | 5.72096900  | 2.59739900  | -0.22165200 |                                              |                             |  |  |
| H                     | 0.92362300  | -3.98146300 | -1.43885700 |                                              |                             |  |  |
| H                     | 4.40078000  | 4.69349400  | -0.43894900 |                                              |                             |  |  |
| H                     | 5.09677000  | -3.79251100 | 1.40867600  |                                              |                             |  |  |
| H                     | 3.55478300  | -3.00478000 | 1.82982600  |                                              |                             |  |  |
| H                     | 5.10489700  | -2.16951900 | 2.14947200  |                                              |                             |  |  |
| H                     | -3.95634900 | 2.42257400  | 2.96728800  |                                              |                             |  |  |
| H                     | -2.65729600 | 1.20267900  | 3.02413500  |                                              |                             |  |  |
| H                     | -2.64071500 | 2.47364100  | 1.76319400  |                                              |                             |  |  |
| O                     | -5.12607900 | 1.92643300  | -1.00699800 |                                              |                             |  |  |
| H                     | -4.65681100 | 2.25387700  | -0.22063200 |                                              |                             |  |  |
| O                     | -6.33220500 | 1.51423000  | -0.53134900 |                                              |                             |  |  |
| H                     | -6.09004000 | 0.37492900  | -0.04286200 |                                              |                             |  |  |
| <b>Name</b>           |             |             |             | <b>CMB-C17-TS-P</b>                          |                             |  |  |
| Cartesian Coordinates |             |             |             | Energy                                       |                             |  |  |
| O                     | -0.02755200 | 0.29499500  | -0.04261900 | Zero-point correction=                       | 0.369493 (Hartree/Particle) |  |  |
| O                     | -1.17444800 | -2.23851400 | -0.46429400 | Thermal correction to Energy=                | 0.397294                    |  |  |
| O                     | -1.58972700 | 2.43613800  | 0.16416300  | Thermal correction to Enthalpy=              | 0.398238                    |  |  |
| O                     | 0.88843600  | -3.74406400 | 0.77152300  | Thermal correction to Gibbs Free Energy=     | 0.309476                    |  |  |
| O                     | -3.88228100 | -2.52155600 | -0.51447900 | Sum of electronic and zero-point Energies=   | -1525.112911                |  |  |
| O                     | 4.51529100  | 2.08976500  | -1.03436500 | Sum of electronic and thermal Energies=      | -1525.085111                |  |  |
| O                     | 6.21599100  | 0.37262100  | 0.00853300  | Sum of electronic and thermal Enthalpies=    | -1525.084167                |  |  |
| O                     | -1.66911800 | 4.62150000  | 0.44868600  | Sum of electronic and thermal Free Energies= | -1525.172929                |  |  |
| C                     | 0.72738700  | -0.86609500 | 0.12945800  |                                              |                             |  |  |
| C                     | 0.20768900  | -1.99344100 | -0.76364100 |                                              |                             |  |  |
| C                     | 2.17795300  | -0.54279200 | 0.08748900  |                                              |                             |  |  |
| C                     | -1.37287200 | 0.11962200  | -0.14176800 |                                              |                             |  |  |
| C                     | -1.94216700 | -1.13163300 | -0.33399100 |                                              |                             |  |  |
| C                     | 0.89202100  | -3.33169400 | -0.57939700 |                                              |                             |  |  |
| C                     | -2.19961900 | 1.23732500  | -0.01514400 |                                              |                             |  |  |
| C                     | -3.34393800 | -1.27675600 | -0.37445800 |                                              |                             |  |  |
| C                     | -3.58496100 | 1.10445900  | -0.05523200 |                                              |                             |  |  |
| C                     | 2.61082500  | 0.66403800  | -0.48487600 |                                              |                             |  |  |
| C                     | 3.10941400  | -1.41718800 | 0.64724000  |                                              |                             |  |  |
| C                     | -4.14985000 | -0.16880200 | -0.23494700 |                                              |                             |  |  |

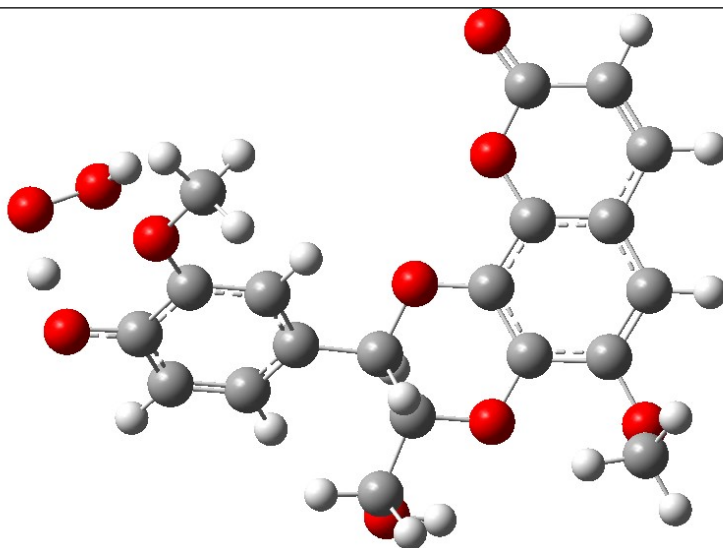



|   |             |             |             |
|---|-------------|-------------|-------------|
| C | 3.96194500  | 0.96427900  | -0.51094300 |
| C | 4.46635000  | -1.11154400 | 0.61668700  |
| C | -4.35847000 | 2.30971100  | 0.10555600  |
| C | 4.89841800  | 0.07039600  | 0.03827200  |
| C | -3.75110100 | 3.49745200  | 0.27924200  |
| C | -2.29811500 | 3.60620200  | 0.30944200  |
| C | -3.82924200 | -3.02259800 | -1.85202000 |
| C | 3.63483000  | 3.07835800  | -1.55417500 |
| H | 0.28985300  | -1.67054300 | -1.81118300 |
| H | 0.38186800  | -4.05918100 | -1.22010100 |
| H | 1.93156000  | -3.26628100 | -0.89994400 |
| H | 1.88559300  | 1.35152000  | -0.89837700 |
| H | 2.77238300  | -2.32838400 | 1.12824400  |
| H | -5.22665900 | -0.28963600 | -0.26123100 |
| H | 5.19975300  | -1.77931900 | 1.05283900  |
| H | -5.44092500 | 2.23855200  | 0.08597000  |
| H | -0.02231500 | -3.73616200 | 1.09092700  |
| H | -4.29709900 | 4.42262900  | 0.40395300  |
| H | -4.26639400 | -4.01947100 | -1.82773100 |
| H | -2.79763200 | -3.08552000 | -2.20609300 |
| H | -4.41304300 | -2.38106100 | -2.51883200 |
| H | 6.31919900  | 1.23743800  | -0.41117500 |
| H | 4.26633000  | 3.89758700  | -1.89065800 |
| H | 3.06557800  | 2.68390900  | -2.39995900 |
| H | 2.95137500  | 3.43478200  | -0.77907200 |
| O | -0.57569200 | -0.20448200 | 2.80007700  |
| H | 0.14501000  | 0.31387900  | 3.19036900  |
| O | 0.00707600  | -1.41236500 | 2.48376200  |
| H | 0.45276900  | -1.25284600 | 1.32741000  |

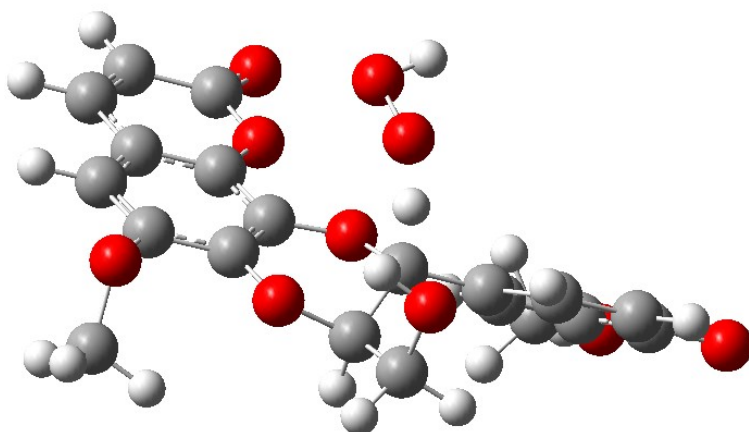

| Name                  |             |             |             | CMC-O14-TS-P                                 |                             |
|-----------------------|-------------|-------------|-------------|----------------------------------------------|-----------------------------|
| Cartesian Coordinates |             |             |             | Energy                                       |                             |
| O                     | -0.41261200 | -2.31651300 | 0.66233800  | Zero-point correction=                       | 0.403160 (Hartree/Particle) |
| O                     | -1.80660900 | -0.91313900 | -1.36328300 | Thermal correction to Energy=                | 0.433162                    |
| O                     | -3.13938400 | -3.10018500 | -2.50748600 | Thermal correction to Enthalpy=              | 0.434106                    |
| O                     | -3.39724100 | 1.10739900  | -0.70270900 | Thermal correction to Gibbs Free Energy=     | 0.339521                    |
| O                     | -0.65853700 | -1.55608200 | 3.25792300  | Sum of electronic and zero-point Energies=   | -1639.594315                |
| O                     | 2.07172400  | 2.09234700  | -1.77701700 | Sum of electronic and thermal Energies=      | -1639.564314                |
| O                     | 4.66980600  | -1.30927000 | 0.28823200  | Sum of electronic and thermal Enthalpies=    | -1639.563369                |
| O                     | 4.43852900  | 1.21878200  | -0.96023000 | Sum of electronic and thermal Free Energies= | -1639.657955                |
| O                     | -4.77569900 | 2.66340100  | -1.43956900 |                                              |                             |
| C                     | 0.07387500  | -2.32828700 | -0.69353100 |                                              |                             |
| C                     | -1.09709900 | -2.13030500 | -1.64866600 |                                              |                             |
| C                     | 1.22111600  | -1.34391100 | -0.81583000 |                                              |                             |
| C                     | -1.91418500 | -0.59138600 | -0.04736700 |                                              |                             |
| C                     | -1.21330000 | -1.26049600 | 0.95134100  |                                              |                             |
| C                     | -2.08371100 | -3.28825000 | -1.59045100 |                                              |                             |
| C                     | -2.74468100 | 0.47564000  | 0.30841400  |                                              |                             |
| C                     | -1.34418800 | -0.87094200 | 2.30003800  |                                              |                             |
| C                     | 2.44280800  | -1.73381400 | -0.27340000 |                                              |                             |
| C                     | 1.05093100  | -0.05976400 | -1.34664100 |                                              |                             |
| C                     | -2.89156300 | 0.85710200  | 1.63976500  |                                              |                             |
| C                     | -2.18054500 | 0.17024800  | 2.63644000  |                                              |                             |
| C                     | 2.12230700  | 0.81988300  | -1.33789700 |                                              |                             |
| C                     | 3.52023900  | -0.85759600 | -0.24018900 |                                              |                             |

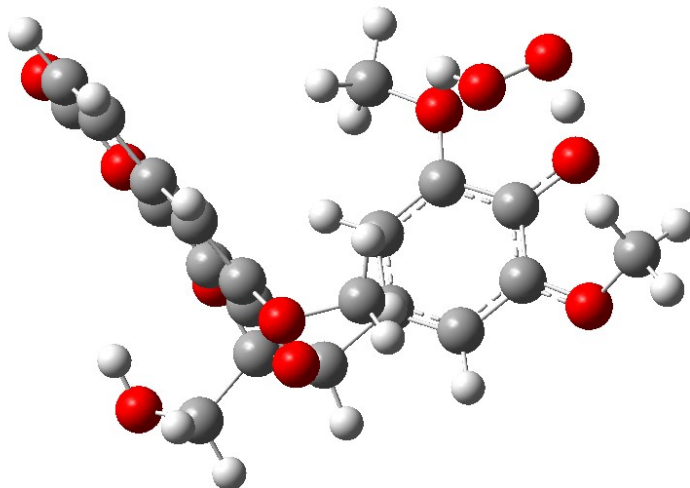

|                       |             |             |             |                                                           |
|-----------------------|-------------|-------------|-------------|-----------------------------------------------------------|
| C                     | 3.39676600  | 0.43205000  | -0.82325000 |                                                           |
| C                     | -3.78262000 | 1.95814700  | 1.90802000  |                                                           |
| C                     | -4.42824000 | 2.57945500  | 0.90489000  |                                                           |
| C                     | -4.24909300 | 2.16458300  | -0.48097800 |                                                           |
| C                     | 0.72752100  | -1.20568900 | 3.32013600  |                                                           |
| C                     | 0.85123500  | 2.55031600  | -2.35904200 |                                                           |
| C                     | 5.50246800  | -0.40597300 | 1.02973000  |                                                           |
| H                     | 0.46026100  | -3.33861700 | -0.83434000 |                                                           |
| H                     | -0.72971100 | -2.01254800 | -2.66980400 |                                                           |
| H                     | -1.57195100 | -4.20962000 | -1.87413400 |                                                           |
| H                     | -2.46318900 | -3.40520900 | -0.56736400 |                                                           |
| H                     | 2.56879200  | -2.72068000 | 0.15804800  |                                                           |
| H                     | 0.10047900  | 0.24355900  | -1.76106100 |                                                           |
| H                     | -2.28089900 | 0.45760900  | 3.67670200  |                                                           |
| H                     | -3.92114800 | 2.27397700  | 2.93687500  |                                                           |
| H                     | -3.56533800 | -2.26033400 | -2.30128500 |                                                           |
| H                     | -5.10508100 | 3.40739000  | 1.06646900  |                                                           |
| H                     | 1.17848100  | -1.85361600 | 4.07009200  |                                                           |
| H                     | 0.83768900  | -0.15970200 | 3.62200800  |                                                           |
| H                     | 1.21616200  | -1.36492300 | 2.35545400  |                                                           |
| H                     | 0.59544300  | 1.95352000  | -3.23715200 |                                                           |
| H                     | 1.03428000  | 3.58038700  | -2.65517900 |                                                           |
| H                     | 0.03433400  | 2.51398700  | -1.63230000 |                                                           |
| H                     | 6.02654500  | -1.02451500 | 1.75705500  |                                                           |
| H                     | 4.89534200  | 0.33731100  | 1.55088900  |                                                           |
| H                     | 6.21707400  | 0.09044900  | 0.37613400  |                                                           |
| O                     | 2.81379200  | 2.48834500  | 1.01721300  |                                                           |
| H                     | 2.13514000  | 2.73528000  | 0.36430000  |                                                           |
| O                     | 3.96629700  | 3.00246800  | 0.51744300  |                                                           |
| H                     | 4.29653400  | 2.14977800  | -0.39343700 |                                                           |
| <b>Name</b>           |             |             |             | <b>CMC-C18-TS-P</b>                                       |
| Cartesian Coordinates |             |             |             | Energy                                                    |
| O                     | -0.19038000 | -0.13934100 | -1.78158100 | Zero-point correction= 0.402034 (Hartree/Particle)        |
| O                     | -1.01535900 | 1.60430900  | 0.28216200  | Thermal correction to Energy= 0.432729                    |
| O                     | -1.51209400 | 3.87454100  | -1.31857200 | Thermal correction to Enthalpy= 0.433673                  |
| O                     | -3.25409200 | 1.08259200  | 1.63739800  | Thermal correction to Gibbs Free Energy= 0.337433         |
| O                     | -1.61828100 | -2.23024200 | -2.43065100 | Sum of electronic and zero-point Energies= -1639.585661   |
| O                     | 4.63389800  | 1.14653300  | 1.70563300  | Sum of electronic and thermal Energies= -1639.554966      |
| O                     | 2.84503200  | -3.09269700 | 0.75537400  | Sum of electronic and thermal Enthalpies= -1639.554022    |
| O                     | 4.69492600  | -1.46613100 | 1.98848700  | Sum of electronic and thermal Free Energies= -1639.650262 |
| O                     | -4.61368100 | 1.72672700  | 3.25095500  |                                                           |
| C                     | 0.68200500  | 0.80644000  | -1.22411200 |                                                           |
| C                     | -0.07675900 | 2.02271000  | -0.72522800 |                                                           |
| C                     | 1.70595800  | 0.20716700  | -0.34258300 |                                                           |
| C                     | -1.73133000 | 0.50093300  | -0.05827500 |                                                           |
| C                     | -1.33476600 | -0.35602700 | -1.07425400 |                                                           |
| C                     | -0.82058300 | 2.75704000  | -1.83347000 |                                                           |
| C                     | -2.90571600 | 0.21613300  | 0.64937800  |                                                           |
| C                     | -2.10944100 | -1.48835900 | -1.41774400 |                                                           |
| C                     | 1.77849800  | -1.17583500 | -0.17475600 |                                                           |
| C                     | 2.66360300  | 1.03877000  | 0.27064400  |                                                           |
| C                     | -3.66796900 | -0.89986800 | 0.33237500  |                                                           |
| C                     | -3.26651900 | -1.75352000 | -0.71280000 |                                                           |
| C                     | 3.65315500  | 0.47360600  | 1.05426400  |                                                           |

|   |             |             |             |
|---|-------------|-------------|-------------|
| C | 2.77175700  | -1.73820400 | 0.61974300  |
| C | 3.71811700  | -0.92132200 | 1.23530200  |
| C | -4.86178000 | -1.11197800 | 1.11184200  |
| C | -5.20316500 | -0.25698000 | 2.09278000  |
| C | -4.38462900 | 0.90974700  | 2.39846100  |
| C | -2.36321500 | -3.37785400 | -2.81174400 |
| C | 4.63638900  | 2.56661200  | 1.61529700  |
| C | 2.46051000  | -3.56672600 | 2.04849400  |
| H | 0.58853700  | 2.71744500  | -0.21531700 |
| H | -0.09762900 | 3.13345900  | -2.55993000 |
| H | -1.50291400 | 2.07543300  | -2.35600000 |
| H | 1.07071800  | -1.83580500 | -0.66091100 |
| H | 2.62986200  | 2.11106300  | 0.12553000  |
| H | -3.87832300 | -2.61522000 | -0.94400800 |
| H | -5.48002100 | -1.97579300 | 0.88980900  |
| H | -2.10716300 | 3.56500700  | -0.62605700 |
| H | -6.09089900 | -0.38350900 | 2.69744200  |
| H | -1.81370300 | -3.83058400 | -3.63396100 |
| H | -3.36514400 | -3.09906400 | -3.15074100 |
| H | -2.43531700 | -4.09015900 | -1.98489100 |
| H | 5.24573300  | -0.74970700 | 2.33410400  |
| H | 4.78193300  | 2.88806300  | 0.58055500  |
| H | 5.47218800  | 2.90564200  | 2.22293300  |
| H | 3.70363200  | 2.97863800  | 2.00884500  |
| H | 2.56676800  | -4.65000900 | 2.02397700  |
| H | 1.41782000  | -3.30428600 | 2.25100200  |
| H | 3.10595200  | -3.15407000 | 2.82642000  |
| O | 3.14276700  | 0.48726800  | -2.99244400 |
| H | 3.74472200  | 0.71693900  | -2.26559700 |
| O | 2.26089200  | 1.53750900  | -3.05425800 |
| H | 1.38950600  | 1.23307700  | -2.22492300 |

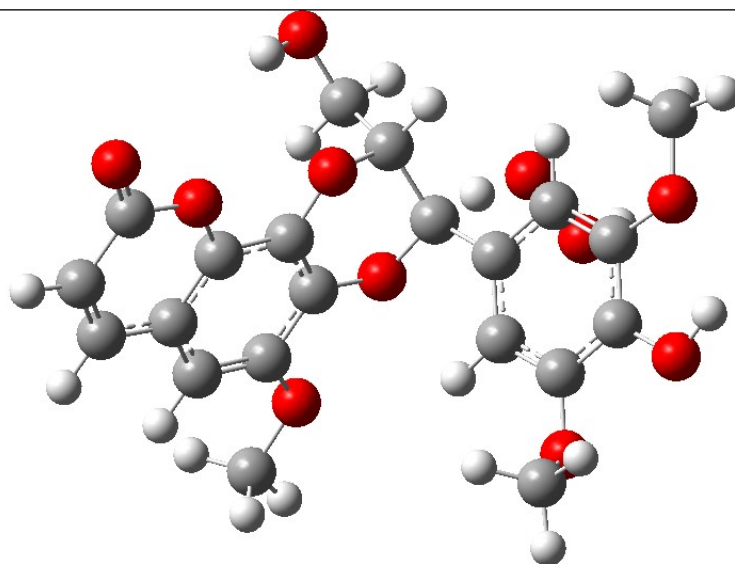

| Name                  |             |             |             | CMA-O14-TS-H                                 |                             |
|-----------------------|-------------|-------------|-------------|----------------------------------------------|-----------------------------|
| Cartesian Coordinates |             |             |             | Energy                                       |                             |
| O                     | -0.26503300 | 0.96316700  | -0.16940800 | Zero-point correction=                       | 0.368937 (Hartree/Particle) |
| O                     | -1.77963500 | -1.42839800 | -0.24194600 | Thermal correction to Energy=                | 0.396646                    |
| O                     | 0.25241800  | -3.14115200 | 0.87828600  | Thermal correction to Enthalpy=              | 0.397591                    |
| O                     | -4.43942000 | -1.30016400 | -0.08305300 | Thermal correction to Gibbs Free Energy=     | 0.308142                    |
| O                     | -1.50200500 | 3.35978400  | -0.02290200 | Sum of electronic and zero-point Energies=   | -1525.127556                |
| O                     | 5.10903600  | -1.17489100 | 0.90909100  | Sum of electronic and thermal Energies=      | -1525.099846                |
| O                     | 5.72652400  | -0.16686700 | -1.46169800 | Sum of electronic and thermal Enthalpies=    | -1525.098902                |
| O                     | -6.32048100 | -2.44414500 | -0.06848700 | Sum of electronic and thermal Free Energies= | -1525.188351                |
| C                     | 0.33424000  | -0.31530800 | 0.10215000  |                                              |                             |
| C                     | -0.41493100 | -1.39254100 | -0.68629300 |                                              |                             |
| C                     | 1.78066000  | -0.23660300 | -0.29673600 |                                              |                             |
| C                     | -2.36080800 | -0.20341900 | -0.13057600 |                                              |                             |
| C                     | -1.61966600 | 0.97239500  | -0.09817400 |                                              |                             |
| C                     | 0.13908100  | -2.78858000 | -0.49151000 |                                              |                             |
| C                     | -3.75151100 | -0.12032900 | -0.04875000 |                                              |                             |
| C                     | -2.26905800 | 2.21950400  | -0.00840700 |                                              |                             |
| C                     | -4.40152700 | 1.10659500  | 0.04939400  |                                              |                             |
| C                     | 2.75001800  | -0.73287900 | 0.56483300  |                                              |                             |
| C                     | 2.12779600  | 0.28931700  | -1.55385700 |                                              |                             |
| C                     | -3.64046900 | 2.28647800  | 0.06632600  |                                              |                             |
| C                     | 4.08919500  | -0.72046200 | 0.17348800  |                                              |                             |

|   |             |             |             |
|---|-------------|-------------|-------------|
| C | 3.44976300  | 0.33361800  | -1.93842000 |
| C | -5.83848400 | 1.08383600  | 0.11574200  |
| C | 4.45192900  | -0.17690100 | -1.09575400 |
| C | -6.51206200 | -0.08240100 | 0.08040000  |
| C | -5.80911400 | -1.34476000 | -0.02592200 |
| C | -0.96291000 | 3.68768500  | 1.26697300  |
| C | 4.82855500  | -1.62919300 | 2.23601600  |
| H | 0.23734700  | -0.51967800 | 1.17180800  |
| H | -0.39862700 | -1.13355800 | -1.75126700 |
| H | -0.50541500 | -3.49311000 | -1.02467900 |
| H | 1.13944700  | -2.84062700 | -0.92214400 |
| H | 2.45815100  | -1.12708300 | 1.52989600  |
| H | 1.35340600  | 0.66948400  | -2.20953900 |
| H | -4.12991000 | 3.25068900  | 0.13817400  |
| H | 3.75046900  | 0.74529700  | -2.89449800 |
| H | -6.36788500 | 2.02739800  | 0.19283100  |
| H | -0.63519400 | -3.18368600 | 1.25396500  |
| H | -7.59079600 | -0.13914600 | 0.12625200  |
| H | -0.35130200 | 4.57724100  | 1.13005100  |
| H | -0.34701700 | 2.86865100  | 1.64471900  |
| H | -1.77577400 | 3.89750600  | 1.96621200  |
| H | 4.38080300  | -0.82447300 | 2.82247000  |
| H | 4.16476000  | -2.49534300 | 2.21025400  |
| H | 5.78924300  | -1.90982700 | 2.65924800  |
| H | 6.26768000  | 0.48503400  | -0.78255700 |
| H | 4.98053900  | 2.48033800  | 0.00809700  |
| O | 6.55571600  | 1.46790900  | 0.06660500  |
| O | 5.33236700  | 1.77083100  | 0.57415900  |

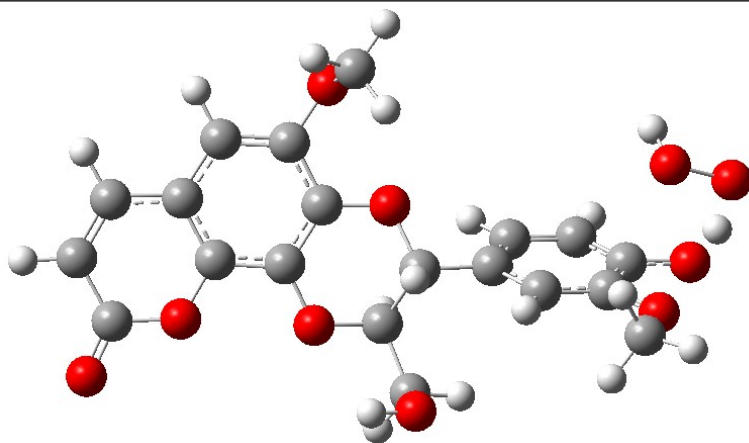

| Name                  |             |             |             | CMB-O14-TS-H                                 |                             |
|-----------------------|-------------|-------------|-------------|----------------------------------------------|-----------------------------|
| Cartesian Coordinates |             |             |             | Energy                                       |                             |
| O                     | 0.46283200  | 0.23358400  | -0.30011100 | Zero-point correction=                       | 0.369103 (Hartree/Particle) |
| O                     | 1.76532200  | -2.25349700 | 0.05622700  | Thermal correction to Energy=                | 0.396581                    |
| O                     | 1.90922300  | 2.47226800  | -0.36130800 | Thermal correction to Enthalpy=              | 0.397525                    |
| O                     | -0.13954800 | -3.86862900 | -1.34805700 | Thermal correction to Gibbs Free Energy=     | 0.309008                    |
| O                     | 4.45957900  | -2.37600100 | 0.21943700  | Sum of electronic and zero-point Energies=   | -1525.127689                |
| O                     | -4.15731000 | 0.55149300  | 1.78516400  | Sum of electronic and thermal Energies=      | -1525.100211                |
| O                     | -5.73441400 | -0.43402100 | -0.10076200 | Sum of electronic and thermal Enthalpies=    | -1525.099267                |
| O                     | 1.86350500  | 4.66467600  | -0.55394900 | Sum of electronic and thermal Free Energies= | -1525.187784                |
| C                     | -0.17426200 | -1.00371200 | -0.65649100 |                                              |                             |
| C                     | 0.35185700  | -2.10831300 | 0.26454300  |                                              |                             |
| C                     | -1.65868500 | -0.81666900 | -0.51895100 |                                              |                             |
| C                     | 1.81419100  | 0.13196900  | -0.16884100 |                                              |                             |
| C                     | 2.45693800  | -1.08920100 | -0.00052400 |                                              |                             |
| C                     | -0.25829100 | -3.47038600 | 0.00833800  |                                              |                             |
| C                     | 2.58414200  | 1.29518000  | -0.20425900 |                                              |                             |
| C                     | 3.86115400  | -1.14447800 | 0.09886000  |                                              |                             |
| C                     | 3.97102600  | 1.25184700  | -0.09317100 |                                              |                             |
| C                     | -2.16783600 | -0.17948300 | 0.60721200  |                                              |                             |
| C                     | -2.51311500 | -1.32780000 | -1.50949000 |                                              |                             |
| C                     | 4.60813300  | 0.00921300  | 0.05578100  |                                              |                             |
| C                     | -3.54730000 | -0.04818900 | 0.75364800  |                                              |                             |
| C                     | -3.87825600 | -1.18919100 | -1.38230300 |                                              |                             |
| C                     | 4.67261100  | 2.50691900  | -0.14796400 |                                              |                             |
| C                     | -4.42391700 | -0.55700000 | -0.25281300 |                                              |                             |

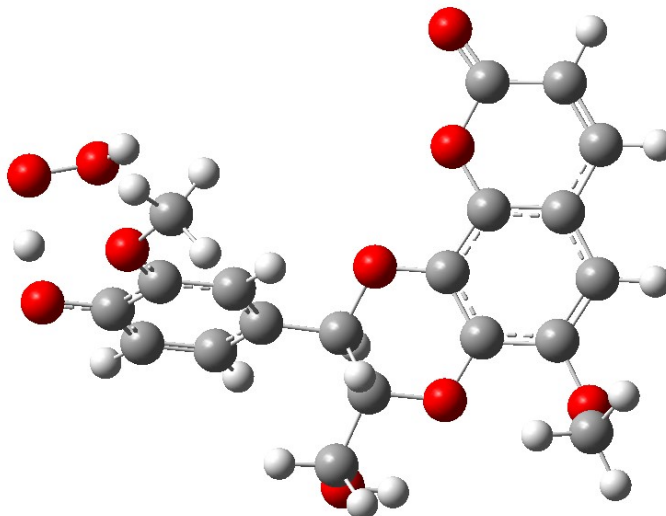

|                       |             |             |             |                                                           |
|-----------------------|-------------|-------------|-------------|-----------------------------------------------------------|
| C                     | 4.00179900  | 3.66528800  | -0.29937500 |                                                           |
| C                     | 2.55757700  | 3.67966300  | -0.41387900 |                                                           |
| C                     | 4.49313800  | -2.84934500 | 1.57460700  |                                                           |
| C                     | -3.33744800 | 1.21274500  | 2.75368700  |                                                           |
| H                     | 0.08778900  | -1.24332300 | -1.69062300 |                                                           |
| H                     | 0.17855900  | -1.81384800 | 1.30616700  |                                                           |
| H                     | 0.22395200  | -4.19413400 | 0.67157000  |                                                           |
| H                     | -1.32213800 | -3.43977800 | 0.24551400  |                                                           |
| H                     | -1.49265200 | 0.20967900  | 1.35825300  |                                                           |
| H                     | -2.08959200 | -1.81836000 | -2.37807300 |                                                           |
| H                     | 5.68732700  | -0.04449800 | 0.13954100  |                                                           |
| H                     | -4.56021800 | -1.55995500 | -2.13806200 |                                                           |
| H                     | 5.75407100  | 2.49920600  | -0.06458600 |                                                           |
| H                     | 0.79822400  | -3.97289600 | -1.54986700 |                                                           |
| H                     | 4.49369300  | 4.62700300  | -0.34456100 |                                                           |
| H                     | 4.94589000  | -3.83846900 | 1.54663400  |                                                           |
| H                     | 3.48190000  | -2.91579300 | 1.98201500  |                                                           |
| H                     | 5.09957300  | -2.17836300 | 2.18751000  |                                                           |
| H                     | -4.02701600 | 1.67225100  | 3.45661900  |                                                           |
| H                     | -2.70204000 | 0.49201600  | 3.27133100  |                                                           |
| H                     | -2.72715400 | 1.97855500  | 2.27002800  |                                                           |
| H                     | -5.98593800 | 0.62519800  | -0.09576700 |                                                           |
| H                     | -4.22208300 | 2.42799800  | 0.08278500  |                                                           |
| O                     | -5.98364400 | 1.93051700  | -0.31093100 |                                                           |
| O                     | -4.70840600 | 2.16375800  | -0.71922500 |                                                           |
| <b>Name</b>           |             |             |             | <b>CMC-O14-TS-H</b>                                       |
| Cartesian Coordinates |             |             |             | Energy                                                    |
| O                     | -0.37282700 | -2.44498500 | 0.51203100  | Zero-point correction= 0.402064 (Hartree/Particle)        |
| O                     | -1.79748200 | -0.87370700 | -1.36926400 | Thermal correction to Energy= 0.432288                    |
| O                     | -3.24055900 | -3.00920400 | -2.56992100 | Thermal correction to Enthalpy= 0.433233                  |
| O                     | -3.19578400 | 1.22277600  | -0.53764700 | Thermal correction to Gibbs Free Energy= 0.338317         |
| O                     | -0.45167300 | -1.81712300 | 3.14616100  | Sum of electronic and zero-point Energies= -1639.602701   |
| O                     | 2.15320100  | 1.93378900  | -2.21791600 | Sum of electronic and thermal Energies= -1639.572476      |
| O                     | 4.45838800  | -1.07298300 | 0.63977300  | Sum of electronic and thermal Enthalpies= -1639.571532    |
| O                     | 4.32386900  | 1.31171300  | -0.85599200 | Sum of electronic and thermal Free Energies= -1639.666448 |
| O                     | -4.48540200 | 2.90250800  | -1.13852800 |                                                           |
| C                     | 0.06077200  | -2.37094400 | -0.86314200 |                                                           |
| C                     | -1.14747700 | -2.10105900 | -1.74921000 |                                                           |
| C                     | 1.19514400  | -1.36668000 | -0.95027500 |                                                           |
| C                     | -1.80713300 | -0.60547000 | -0.03683300 |                                                           |
| C                     | -1.10459400 | -1.36220400 | 0.89537000  |                                                           |
| C                     | -2.15252400 | -3.24087300 | -1.69119400 |                                                           |
| C                     | -2.53575100 | 0.49684200  | 0.41339400  |                                                           |
| C                     | -1.14986800 | -1.02993300 | 2.26185800  |                                                           |
| C                     | 2.33628500  | -1.65988100 | -0.19607900 |                                                           |
| C                     | 1.08945800  | -0.17165000 | -1.65874700 |                                                           |
| C                     | -2.58812300 | 0.83231000  | 1.76308100  |                                                           |
| C                     | -1.88570900 | 0.04982900  | 2.69304900  |                                                           |
| C                     | 2.14131100  | 0.73747900  | -1.60764400 |                                                           |
| C                     | 3.37299500  | -0.75114200 | -0.11182700 |                                                           |
| C                     | 3.31159000  | 0.45985600  | -0.84435800 |                                                           |
| C                     | -3.37343000 | 1.98418500  | 2.12204700  |                                                           |
| C                     | -4.01874700 | 2.69857000  | 1.18021800  |                                                           |
| C                     | -3.94394500 | 2.32636100  | -0.21857000 |                                                           |

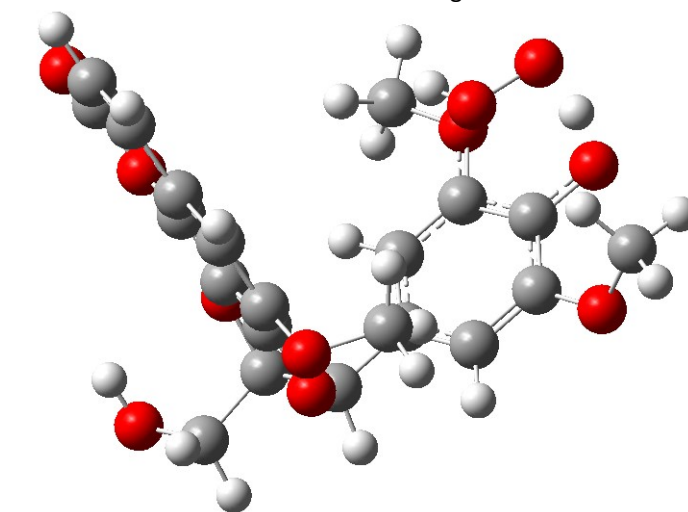

|   |             |             |             |
|---|-------------|-------------|-------------|
| C | 0.90331500  | -1.37490200 | 3.32411100  |
| C | 0.95876500  | 2.35594600  | -2.88102200 |
| C | 4.95625500  | -0.07202300 | 1.54765900  |
| H | 0.44008500  | -3.36840500 | -1.08661100 |
| H | -0.82744400 | -1.94801800 | -2.78084500 |
| H | -1.66033900 | -4.15724200 | -2.01989800 |
| H | -2.50836500 | -3.38237300 | -0.66524100 |
| H | 2.40264600  | -2.58560900 | 0.36425500  |
| H | 0.20168100  | 0.05714300  | -2.23052100 |
| H | -1.91300900 | 0.29882500  | 3.74751500  |
| H | -3.43207300 | 2.26426500  | 3.16829900  |
| H | -3.73018700 | -2.24402600 | -2.24576000 |
| H | -4.61594500 | 3.56991500  | 1.41084900  |
| H | 1.37769400  | -2.08773400 | 3.99586600  |
| H | 0.91402400  | -0.37697400 | 3.76937200  |
| H | 1.42864000  | -1.35934000 | 2.36543900  |
| H | 0.73033500  | 1.69281400  | -3.71729600 |
| H | 1.16550000  | 3.35773100  | -3.24811800 |
| H | 0.12317500  | 2.37938900  | -2.17726200 |
| H | 5.34641200  | -0.61617200 | 2.40624000  |
| H | 4.14633500  | 0.58629400  | 1.86721000  |
| H | 5.75098400  | 0.50837300  | 1.08269200  |
| O | 2.29569200  | 2.31621800  | 0.86324700  |
| H | 1.61541900  | 2.59951900  | 0.22411200  |
| O | 3.41158500  | 3.01523200  | 0.54530900  |
| H | 4.03618200  | 2.19481800  | -0.29707800 |

## References

1. M. G. Evans and M. Polanyi, *Trans. Faraday Soc.*, 1935, **31**, 875-894.
2. H. Eyring, *J. Chem. Phys.*, 1935, **3**, 107-115.
3. D. G. Truhlar, W. L. Hase and J. T. Hynes, *J. Phys. Chem.*, 1983, **87**, 2664-2682.
4. T. Furuncuoglu, I. Ugur, I. Degirmenci and V. Aviyente, *Macromolecules*, 2010, **43**, 1823-1835.
5. E. Vélez, J. Quijano, R. Notario, E. Pabón, J. Murillo, J. Leal, E. Zapata and G. Alarcón, *J. Phys. Org. Chem.*, 2009, **22**, 971-977.
6. E. Pollak and P. Pechukas, *J. Am. Chem. Soc.*, 1978, **100**, 2984-2991.
7. A. Fernández-Ramos, B. A. Ellingson, R. Meana-Pañeda, J. M. Marques and D. G. Truhlar, *Theor. Chem. Acc.*, 2007, **118**, 813-826.
8. C. Eckart, *Phy. Rev.*, 1930, **35**, 1303.
9. R. A. Marcus, *Annu. Rev. Phys. Chem.*, 1964, **15**, 155-196.
10. R. A. Marcus, *Rev. Mod. Phys.*, 1993, **65**, 599.
11. Y. Lu, A. Wang, P. Shi and H. Zhang, *PloS one*, 2017, **12**, e0169773.
12. Y. Lu, A. Wang, P. Shi, H. Zhang and Z. Li, *PloS one*, 2015, **10**, e0133259.
13. S. F. Nelsen, S. C. Blackstock and Y. Kim, *J. Am. Chem. Soc.*, 1987, **109**, 677-682.
14. S. F. Nelsen, M. N. Weaver, Y. Luo, J. R. Pladziewicz, L. K. Ausman, T. L. Jentzsch and J. J. O'Konek, *J. Phys. Chem. A*, 2006, **110**, 11665-11676.
15. A. Galano and J. R. Alvarez-Idaboy, *J. Comput. Chem.*, 2013, **34**, 2430-2445.
16. F. C. Collins and G. E. Kimball, *J. Colloid Sci.*, 1949, **4**, 425-437.
17. M. Von Smoluchowski, *Z. Phys. Chem*, 1917, **92**, 129-168.
18. D. G. Truhlar, *J. Chem. Educ.*, 1985, **62**, 104.
19. A. Einstein, *Ann. Phys.*, 1905, **17**, 549-560.
20. G. G. Stokes, *Mathematical and Physical Papers*, University Press, Cambridge, 1905.
21. A. Galano and J. Raúl Alvarez-Idaboy, *Int. J. Quantum Chem.*, 2019, **119**, e25665.
22. Q. V. Vo, T. V. Gon, M. V. Bay and A. Mechler, *J. Phys. Chem. B*, 2019, **123**, 10672-10679.
23. Q. V. Vo and A. Mechler, *J. Chem. Inf. Model.*, 2020, **60**, 316-321.
24. Y. Okuno, *Chem.: Eur. J.*, 1997, **3**, 212-218.
25. S. Benson, *The foundations of chemical kinetics*, Malabar, Florida, 1982.
26. C. Iuga, J. R. Alvarez-Idaboy and A. Vivier-Bunge, *J. Phys. Chem. B*, 2011, **115**, 12234-12246.
27. J. R. Alvarez-Idaboy, L. Reyes and N. Mora-Diez, *Org. Biomol. Chem.*, 2007, **5**, 3682-3689.
28. T. H. Le, T. T. Tran and L. K. Huynh, *Chemom. Intell. Lab. Syst.*, 2018, **172**, 10-16.
29. E. Dzib, J. L. Cabellos, F. Ortíz-Chi, S. Pan, A. Galano and G. Merino, *Int. J. Quantum Chem.*, 2019, **119**, e25686.



30. E. Dzib, J. L. Cabellos, F. Ortiz-Chi, S. Pan, A. Galano and G. Merino, *Eyringpy 1.0.2*, 2018, Cinvestav, Mérida, Yucatán.
